# Supplementary material for: Breast cancer subtype predictors revisited: from consensus to concordance?
Source: PubMed Central journal article supplement (PMC4893290; doi:10.1186/s12920-016-0185-6), 2016-06-03
Supplement: 12920_2016_185_MOESM1_ESM.pdf [file 12920_2016_185_MOESM1_ESM.pdf]

## **Additional File 1: Supplementary Methods and Results**

### *Breast Cancer Subtype Predictors Revisited: From Consensus to Concordance?*

Herman M.J. Sontrop<sup>1,2</sup>, Marcel J.T. Reinders<sup>3</sup>, Perry D. Moerland<sup>4,\*</sup>

**1 Molecular Diagnostics Department, Philips Research, High Tech Campus 11, 5656 AE Eindhoven, The Netherlands**

**2 Friss Fraud and Risk Solutions, Orteliuslaan 15, 3528 BA, Utrecht, The Netherlands**

**3 Delft Bioinformatics Lab, Delft University of Technology, Mekelweg 4, 2628 CD Delft, The Netherlands**

**4 Bioinformatics Laboratory, Academic Medical Center, Meibergdreef 9, 1105 AZ Amsterdam, The Netherlands**

**\* Corresponding author, e-mail: [p.d.moerland@amc.uva.nl](mailto:p.d.moerland@amc.uva.nl), phone: ++31 205666945**

# Contents

|          |                                                                           |          |
|----------|---------------------------------------------------------------------------|----------|
| <b>1</b> | <b>Gene expression data</b>                                               | <b>2</b> |
| 1.1      | Normalization . . . . .                                                   | 2        |
| 1.2      | Quality control . . . . .                                                 | 3        |
| <b>2</b> | <b>Subtype predictors</b>                                                 | <b>5</b> |
| 2.1      | SSP: single sample predictor . . . . .                                    | 5        |
| 2.2      | SCM: subtype classification model . . . . .                               | 5        |
| 2.3      | STG: predictor based on St. Gallen surrogate intrinsic subtypes . . . . . | 7        |
| <b>3</b> | <b>Consensus sets</b>                                                     | <b>7</b> |
| 3.1      | Consensus set subtype identification by hierarchical clustering . . . . . | 7        |
| 3.2      | Bimodality status of individual modules . . . . .                         | 8        |
| 3.3      | Concordance of CS-based predictors on consensus sets . . . . .            | 9        |

## 1 Gene expression data

For the construction and evaluation of the consensus set-driven subtype predictors only high-quality Affymetrix arrays were used. This section gives a detailed description of the normalization and quality control (QC) stages used to process and filter these hybridizations. All analyses were performed using R/Bioconductor packages.

### 1.1 Normalization

In order to make the expression data as comparable as possible, we (re)normalized the Affymetrix datasets by a modified version of the RMA methodology, known as frozen RMA (fRMA) [1]. This methodology allows one to normalize the intensity data of different arrays individually or in small batches and then combine the data for analysis. In particular, estimates of probe-specific effects and variances are pre-computed and frozen [1]. Another important distinction between default RMA and fRMA is the estimation of the reference distribution. In fRMA the reference distribution is not estimated from the data itself, but a pre-computed reference distribution is employed. Frozen RMA has the same logistical advantage as single chip models, in that it enables normalizing arrays one by one, while still having the benefits of a multi-chip normalization scheme. Our Affymetrix compendium involved two distinct array designs, i.e. hgu133plus2 and hgu133a arrays. We only considered the 22,215 probesets these designs have in common, which represent all non-control probesets present on the hgu133a platform. In order to utilize the common probesets, the hgu133plus2 arrays were first converted to the hgu133a platform using the function *convertPlatform* from the *frma* package. We then masked all control probesets in the arrays and in the *hgu133afrmavecs* object containing the frozen parameters, resulting in the desired 22,215 probesets. In this way all Affymetrix arrays could be normalised using a single reference distribution, i.e. the Affymetrix hgu133a reference distribution, as constructed by McCall et al. based on 1,000 samples originating from 200 distinct studies [2]. We ran *frma* in robust weighted average mode [1].

Frozen RMA mainly addresses batch effects at probe level. fRMA-normalized data may therefore still contain batch effects at probeset level. Our Affymetrix compendium indeed showed clear evidence of systematic technical variation between arrays from different chip designs after fRMA (Figure S1). This effect was removed via a robust scaling step (Methods, main text). A drawback of our approach is the loss of some hgu133plus2 probesets that are part of the gene list of certain subtype predictors. Some of these are Affymetrix control probesets which, interestingly, are included in the PAM50 gene list.

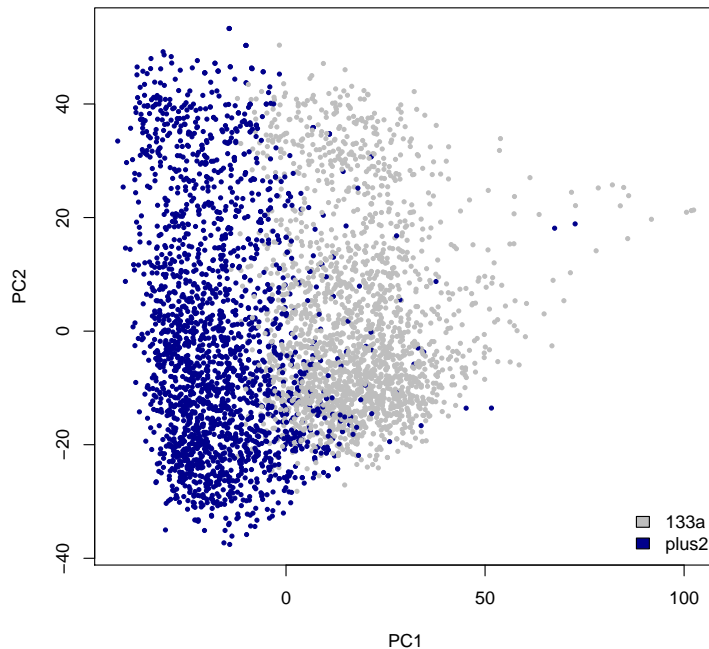

**Figure S1. Principal component analysis of fRMA-normalized data (combined hgu133plus2 and hgu133a compendium).** Principal component (PC) analysis plot of the fRMA-normalized expression data from our Affymetrix compendium. Expression data originated from two chip designs, i.e. hgu133plus2 and hgu133a. In order to reduce systematic technical variation we used the frozen RMA methodology in which both array designs were normalized via a single reference distribution. A set of 3,400 genes related to breast cancer subtyping was used to estimate the principal components. This set corresponds to the union of all genes contained in the gene lists of the classic SSPs, classic SCMs and the CIT subtyping scheme of Guedj et al. [3] for which probesets are present on the Affymetrix hgu133a design.

## 1.2 Quality control

Poor hybridizations can have a negative impact on performance [4]. As we used datasets related to a substantial collection of high-quality publications, one may reasonably expect these hybridizations had passed quality control. However, after a preliminary QC inspection a sizable number of arrays appeared to be problematic for one or more well established QC control indicators. Figure S2 provides several examples of problematic arrays encountered in our compendium. To ensure all hybridizations were of sufficient quality, an extensive QC analysis was performed aimed at identifying hybridizations that consistently showed indications of poor quality, either before or after normalization. The QC protocol we followed was based on six QC indicators:  $Q = \{\text{RLE}, \text{NUSE}, \text{heatmap}, \text{boxplot}, \text{MA-plot}, \text{GNUSE}\}$ . The first five represent well established QC indicators [4]. The GNUSE statistic was introduced by McCall et al. [5] and is an fRMA-based single chip alternative to the multi-chip NUSE QC statistic [6]. The NUSE, GNUSE and RLE QC indicators provide diagnostic information before normalization, while the remaining indicators provide information after normalization. All QC statistics with the exception of GNUSE were computed using the *arrayQualityMetrics* package, while GNUSE values were computed using the *frma* package. For a given QC indicator  $q$  and array  $i$  we used *arrayQualityMetrics* to obtain a series of QC scores and thresholds by repeatedly analyzing array  $i$  in the presence of  $B$  randomly selected arrays from the same dataset. Higher scores reflect arrays of potentially poor quality, while scores higher than the threshold are considered outlier arrays. For a given array  $i$  and QC indicator  $q \in Q$ , let  $S_{i,r}^q$  and  $\tau_r^q$  be the QC score and

threshold, respectively, as determined by *arrayQualityMetrics* at repeat  $r$ . Then, an array was rejected if it was considered an outlier in at least half of the QC repeats in which it was included. That is, array  $i$  was rejected based on QC if there exists a  $q' \in Q$  for which we have

$$\sum_{r=1}^R I_{i,r}^{q'} \geq R/2$$

where  $I_{i,r}^q$  is an indicator variable that equals 1 if  $S_{i,r}^q > \tau_r^q$  and 0 otherwise and  $R$  is the number of repeats.

We ran the complete QC protocol on all 4,227 Affymetrix hybridizations part of our compendium. Arrays from different datasets and array designs were processed separately, with a QC batch size of  $B = 30$  and  $R = 10$  repeats. Hence, for each array and QC indicator we obtained 10 QC scores. In total 7.55% of the arrays (319 out of 4,227) were removed based on QC; 250 arrays (5.91%) showed consistent indications of poor quality prior to normalization and 182 (4.31%) after normalization; 2.67% (113 out of 4,227) of the arrays considered showed consistent indications of poor quality both before and after normalization. Table 1 in the main text provides an overview of the QC results per dataset.

A visualization of all computed QC statistics for each dataset is provided on pages 12-23. For each array and QC indicator separately, a box and whisker plot is shown depicting the distribution of the various QC scores associated with each array. For each QC indicator a separate row is used. For reference the QC overview figures also include several other often used Affymetrix QC indicators, i.e. average background, percentage present, and scaling factor. These, however, were not used to filter the arrays. The centered string in the top row shows the name of the dataset, the total number of arrays and the total number of arrays rejected based on QC, taken over all QC indicators. Rejected arrays are indicated by vertical dashed red lines, see Table S7 for a detailed overview. A short ID is used to indicate an array, the full name is available in Table S7. For some datasets additional information was available on the processing groups [7], e.g. the research institute in which the hybridizations were performed. In those instances QC batches were confined to include arrays from the same processing group only, even if this implied a batch size smaller than  $B = 30$ . Distinct processing groups are separated by green vertical lines and results are displayed per processing group. Within each processing group arrays are ordered by their median RLE score. Horizontal blue lines indicate the median QC thresholds. The box and whisker plots clearly illustrate the variability of the QC statistics, which was the main reason to design the resampling-based QC protocol described above.



| x | y | ID   | Dataset      | Chip        | GSM                 |
|---|---|------|--------------|-------------|---------------------|
| 1 | 1 | 771  | Pawitan      | hgu133a     | GSM107151           |
| 1 | 2 | 1051 | Schmidt      | hgu133a     | GSM282572           |
| 1 | 3 | 760  | Pawitan      | hgu133a     | GSM107140           |
| 1 | 4 | 813  | Pawitan      | hgu133a     | GSM107193.          |
| 2 | 1 | 708  | Pawitan      | hgu133a     | GSM107087           |
| 2 | 2 | 670  | MSK          | hgu133a     | GSM50110            |
| 2 | 3 | 1813 | Wang         | hgu133a     | GSM36861            |
| 2 | 4 | 2343 | Bos          | hgu133plus2 | GSM308459           |
| 3 | 1 | 415  | Miller       | hgu133a     | GSM79350            |
| 3 | 2 | 1648 | Symmans (II) | hgu133a     | GSM441336           |
| 3 | 3 | 1564 | Symmans (I)  | hgu133a     | GSM441858           |
| 3 | 4 | 4421 | Sabatier     | hgu133plus2 | GSM540319_15744_T7  |
| 4 | 1 | 4426 | Sabatier     | hgu133plus2 | GSM540324_16325_T56 |
| 4 | 2 | 1845 | Wang         | hgu133a     | GSM36966            |
| 4 | 3 | 1218 | Shi          | hgu133a     | GSM505494           |
| 4 | 4 | 163  | Desmedt      | hgu133a     | GSM177952           |

**Table S1.** Details on the 16 poor quality arrays from Figure S2. x, y: coordinates of the examples, e.g. top left chip pseudo-image: x = 1, y = 1, bottom right: x = 4, y = 4; ID: short ID used in the QC overview figures on pages 12-23 and in Table S7; GSM: accession number in GEO [8].

## 2 Subtype predictors

This section provides a comprehensive description and references to the literature for the different types of subtype predictors used in the main manuscript.

### 2.1 SSP: single sample predictor

The classic single sample predictors are nearest centroid predictors, that is, prototype-driven classification rules that are completely defined by a set of centroids and a suitable distance function (Figure 1A, main text) [9]. In line with previously described SSP schemes [10,11], we used the Spearman rank correlation distance measure. SSPs were constructed using the intrinsic gene lists (IGLs) related to the classic SSPs. We refer to the IGLs of the SSPs by Sørlie et al. [12], Hu et al. [10] and Parker et al. [11] as the IGL S, H and P, respectively. For the classic SSPs we used the following functions from the *genefu* package: *ssp2003.robust* (SSP Sørlie), *ssp2006.robust* (SSP Hu) and *pam50.robust* (SSP Parker).

### 2.2 SCM: subtype classification model

As an alternative to SSPs, Desmedt et al. [13] proposed a biology-inspired module-driven approach referred to as subtype classification models [14] (Figure 1B, main text). Module scores are calculated for three modules that reflect the activity of several key biological processes: (i) estrogen receptor signaling, (ii) HER2 signaling and (iii) proliferation. Three SCMs have been published previously, based on the same set of prototypes: the SCM by Desmedt et al. [13], the SCM by Wirapati et al. [15] and more recently the SCM by Haibe-Kains et al. [14], also known as SCMGENE. We refer to these as the classic SCMs. In addition, for a given SCM we refer to the list of genes associated with a module as the module gene list (MGL). The latter can be thought of as the SCM equivalent of an IGL. We refer to the MGLs corresponding to the SCMs by Desmedt et al. [13], Wirapati et al. [15] and Haibe-Kains et al. [14] as the MGLs D, W and HK, respectively. For the classic SCMs we used the following functions from the *genefu* package: *scmod1.robust* (SCM D), *scmod2.robust* (SCM W) and *scmgene.robust* (SCM HK).

For SCM.cs we used the *subtype.cluster* function in the Bioconductor package *genefu*, which for a given consensus training set and MGL computes the module scores and estimates the parameters of the

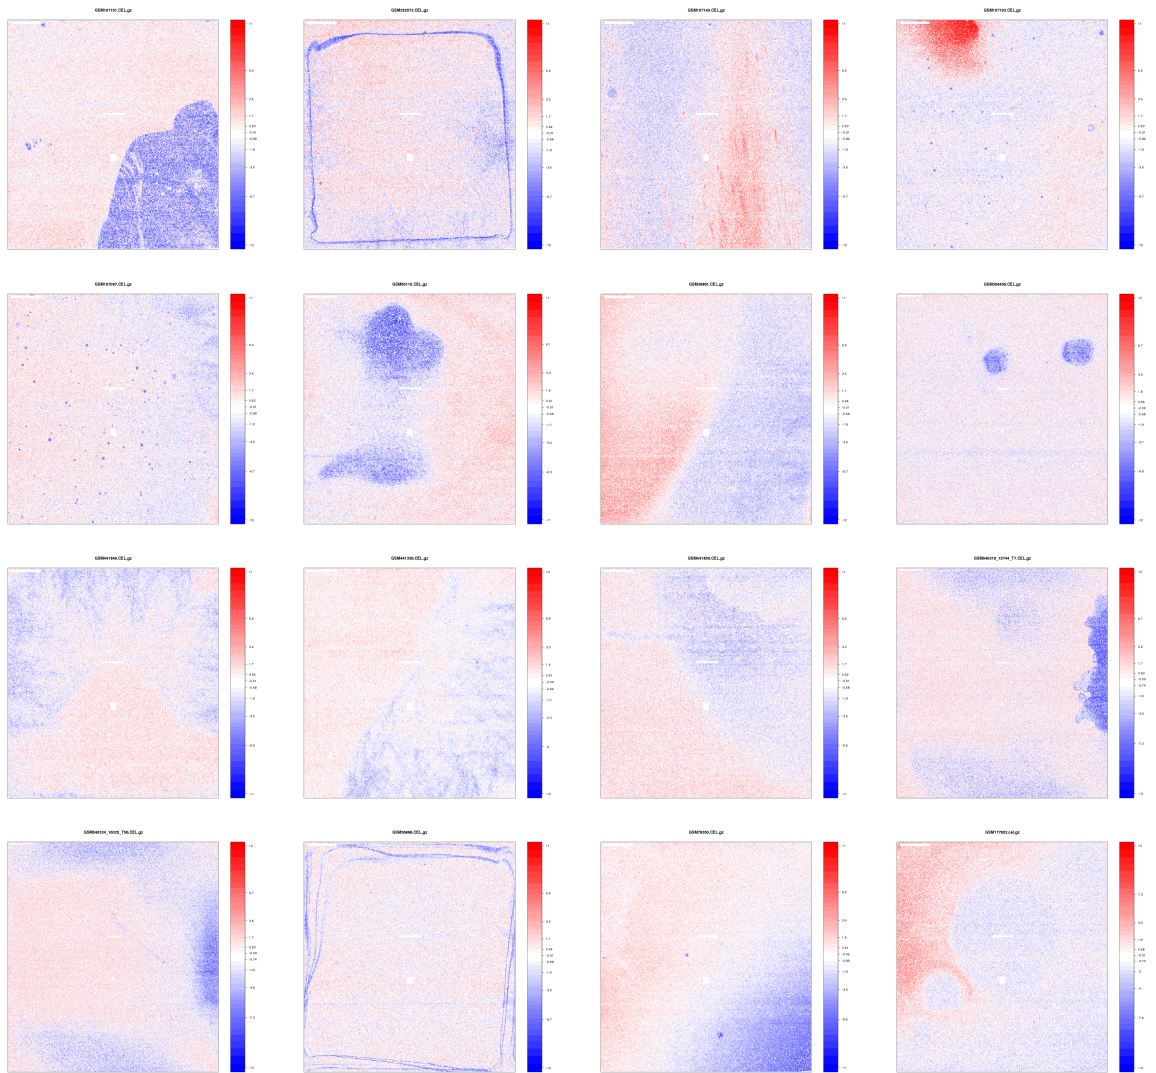

**Figure S2.** Chip pseudo-images for 16 examples of arrays with consistent indications of poor quality. Details are provided in Table S1.

| Probeset    | HUGO gene symbol | Entrez Gene ID |
|-------------|------------------|----------------|
| 202095_s.at | BIRC5            | 332            |
| 202589_at   | TYMS             | 7298           |
| 202870_s.at | CDC20            | 991            |
| 202954_at   | UBE2C            | 11065          |
| 209773_s.at | RRM2             | 6241           |
| 214710_s.at | CCNB1            | 891            |

**Table S2. STG proliferation module.** The module composition of the 6-gene proliferation module was based on the intersection of all genes in the AURKA proliferation modules by Desmedt [13] and Wirapati [15] retrieved from the *genefu* package and the 11-gene proliferation signature proposed by Nielsen et al. [18]. The latter signature consists of the HUGO gene symbol entries: CCNB1, UBE2C, BIRC5, KNTC2, CDC20, PTTG1, RRM2, MKI67, TYMS, CEP55, CDCA1. All probesets had a weight of +1 in the calculation of the module score.

associated mixture model.

### 2.3 STG: predictor based on St. Gallen surrogate intrinsic subtypes

In this study, we developed a rule-based predictor (STG) derived from the St. Gallen surrogate intrinsic subtype definitions which are based on clinical markers of ER, HER2, PGR and KI-67 (proliferation) status [16]. An STG is fully defined by the over/underexpression status of the markers, which allows for 16 distinct profiles (Figure 1C, main text). Over/underexpression status of the four markers was determined by considering module scores. The ER, HER2 and PGR modules consisted of a single probeset. These correspond to the probesets previously suggested for these processes [17], and for ER and HER2 are identical to those used by SCMGENE. The proliferation module was based on the intersection of all genes in the AURKA proliferation modules by Desmedt and Wirapati and the 11-gene proliferation signature proposed by Nielsen et al. [18]. This resulted in a 6-gene proliferation module (Table S2). For each marker and training set separately, over/underexpression was estimated by fitting a 2-component Gaussian mixture model on the module scores. For each component  $i$ , let  $u_i$ ,  $\sigma_i^2$  and  $w_i$  be the estimated mean, variance and mixing proportion, respectively. Assuming equal variances, the following cutoff can be used to determine the actual over/underexpression status for a new case:

$$c = \frac{\sigma^2 \log\left(\frac{w_2}{w_1}\right) + \frac{1}{2}(u_1^2 - u_2^2)}{u_1 - u_2}.$$

Cases with a module score larger than or equal to  $c$  were considered overexpressed, while the others were considered underexpressed.

## 3 Consensus sets

This section gives an overview of a number of additional experiments, characterizing the consensus set samples in more detail.

### 3.1 Consensus set subtype identification by hierarchical clustering

In breast cancer literature SSP construction has almost always been linked to unsupervised learning via hierarchical clustering (HC) [3,10–12]. Instability of hierarchical clustering is a well-known problem [19,20]. Haibe-Kains et al. [14] reported very low levels of concordance for HC-based SSP predictors when clustering complete sample cohorts. We investigated to what extent the subtype labels of the consensus sets could have been identified by HC alone and to what degree their identification is influenced by the presence of additional samples during clustering. Importantly, for any given dataset concordance was always measured

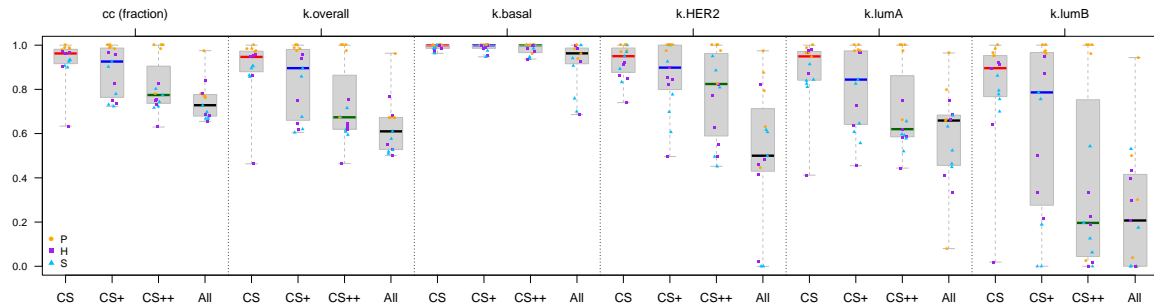

**Figure S3. CS subtype identification by hierarchical clustering.** For each of the training sets used to construct the five consensus sets (Table 2, main text) and for each of the IGLs S, H and P, four hierarchical clusterings were performed, labeled CS, CS+, CS++ and All (indicated on the  $x$ -axis for each panel). These respectively represent clusterings on the CS samples and three supersets of the consensus set. CS+: all samples for which PAM50 and all three SCMs are concordant, i.e. samples for which the St. Gallen criteria were left out of the CS inclusion criteria; CS++: all samples for which all three SCMs were concordant, i.e. samples for which the St. Gallen and the PAM50 CS inclusion criteria were not taken into account; All: the complete training set, i.e. when all CS inclusion criteria were dropped. Depicted are concordance percentage (cc) and kappa statistics between subtype assignments based on hierarchical clustering and the CS subtype labels. For a given set of samples concordance measures were always calculated on the CS samples only. The *intrinsic.cluster.predict* function from the *genefu* package was used to build a dendrogram (correlation distance, average linkage) and cut the dendrogram so as to obtain four clusters with a minimum of five samples per cluster [14]. Concordance between the cluster labels and the consensus set subtype labels was determined by mapping clusters to a subtype label using the *matchClasses* function (method=“exact”) from the R package *e1071*. This function computes all possible permutations between rows and columns of the confusion matrix between two vectors of labels and selects the mapping such that as many cases as possible are in a matched pair. See Table S3 for a detailed numerical summary.

over the CS samples only. When we only cluster CS samples, in all but one case almost perfect levels of concordance were obtained (Figure S3). However, it becomes increasingly more difficult to identify the CS subtype labels by HC when the training set becomes larger (and more heterogeneous). Furthermore, similar to Pusztai et al. [21], results strongly depended on the selected IGL. For the IGL P in nearly all cases almost perfect levels of concordance were obtained, however, not when clustering the CS samples in the presence of all additional samples. Concordance for the IGLs H and S was notably lower, especially when clustering CS samples in the presence of additional samples. Lowest concordance was observed for the luminal B subtype, whose concordance with CS subtype labels decreased strongly in the presence of additional samples.

### 3.2 Bimodality status of individual modules

Module scores are a core ingredient of both SCMs and STGs (Section 2). For a module score that is unimodally distributed, it is difficult to estimate a sensible cutoff for determining the over/underexpression status of the module for individual cases. The bimodality status of a module score, therefore, provides a good indication of the performance of SCM and STG subtyping schemes. We used the bimodality index (BMI) [17] to assess bimodality of the distribution of the module scores related to ER, HER2, and PGR signaling and proliferation on the five consensus sets (Table S4). In most instances all modules showed strong indications of bimodality ( $BMI \geq 1.5$ ). However, the level of bimodality depended on both the dataset and module composition. Furthermore, in some cases modules were only weakly bimodal ( $BMI \geq 1.1$ ) or

| Subset | cc (all, %) | $\kappa$ (all) | $\kappa$ (basal) | $\kappa$ (HER2) | $\kappa$ (lumA) | $\kappa$ (lumB) |
|--------|-------------|----------------|------------------|-----------------|-----------------|-----------------|
| CS     | 96.23       | 0.946          | 1.000            | 0.950           | 0.949           | 0.896           |
| CS+    | 92.59       | 0.896          | 1.000            | 0.898           | 0.844           | 0.786           |
| CS++   | 77.45       | 0.674          | 1.000            | 0.824           | 0.620           | 0.196           |
| All    | 72.84       | 0.610          | 0.963            | 0.500           | 0.659           | 0.207           |

**Table S3. CS subtype identification by hierarchical clustering.** Numerical details of Figure S3: median percentage of concordant samples (cc) and median kappa statistics.

even not bimodal at all (BMI<1.1), in particular for the HER2-related module of Desmedt. Even though the module scores are not always strongly bimodal, the results provide solid ground for fitting the mixture models and cutoff values associated with SCM- and STG-based predictors.

### 3.3 Concordance of CS-based predictors on consensus sets

An important distinction between our approach and previous subtyping efforts is that our CS-based predictors were specifically designed to be highly concordant at the individual sample level. We first investigated the resubstitution performance, i.e. the ability of a CS-based predictor to correctly predict the subtype labels of the CS samples on which it was constructed. As expected, the resubstitution performance showed almost perfect levels of overall and subtype-specific concordance (Table S5).

A prerequisite for concordance over large validation cohorts is that predictors view each others training data in a consistent way. We, therefore, also considered the ‘internal CS’ validation performance, i.e. the ability of a CS-based predictor to predict the labels of all 812 CS samples, minus its own consensus training samples. Also in terms of internal CS validation performance, the CS-based predictors showed almost perfect levels of overall and subtype-specific concordance. The SCM.cs predictors showed the strongest levels of concordance (median  $\kappa$ =0.966, median cc=97.54%, Table S6), closely followed by the SSP.cs predictors (median  $\kappa$ =0.940, median cc=95.66%), with equally strong subtype-specific levels of concordance. These results demonstrate that CS-based predictors are highly concordant on the individual sample level on training data.

|                    | ER HK | ER D | ER W | HER2 HK | HER2 D | HER2 W | PGR  | Proliferation | AURKA HK | AURKA D | AURKA W |
|--------------------|-------|------|------|---------|--------|--------|------|---------------|----------|---------|---------|
| Bos                | 2.45  | 2.26 | 2.09 | 1.76    | 1.28   | 2.26   | 1.97 | 1.40          | 1.08     | 1.24    | 1.36    |
| expO               | 3.11  | 1.94 | 1.94 | 1.40    | 1.14   | 1.72   | 1.71 | 1.78          | 1.65     | 1.57    | 1.52    |
| Guedj              | 2.87  | 1.91 | 1.90 | 1.24    | 0.86   | 1.67   | 1.95 | 1.79          | 1.71     | 1.64    | 1.61    |
| Li                 | 3.63  | 2.39 | 2.22 | 1.16    | 1.09   | 1.52   | 1.93 | 1.86          | 1.61     | 1.68    | 1.64    |
| Sabatier           | 2.90  | 2.55 | 2.62 | 1.44    | 0.94   | 1.53   | 1.98 | 1.87          | 1.52     | 1.70    | 1.63    |
| BMI (median)       | 2.90  | 2.26 | 2.09 | 1.40    | 1.09   | 1.67   | 1.95 | 1.79          | 1.61     | 1.64    | 1.61    |
| Nr. BMI $\geq 1.1$ | 5     | 5    | 5    | 5       | 2      | 5      | 5    | 5             | 4        | 5       | 5       |
| Nr. BMI $\geq 1.5$ | 5     | 5    | 5    | 1       | 0      | 5      | 5    | 4             | 4        | 4       | 4       |

**Table S4. Bimodality indices (BMI) of individual modules on consensus sets.** Wang et al. [17] characterize a distribution as being bimodal if  $\text{BMI} \geq 1.1$  and strongly bimodal if  $\text{BMI} \geq 1.5$ . The first row indicates the various modules used to measure ER, HER2, PGR and proliferation (Section 2). Proliferation was measured by the AURKA proliferation modules by Haibe-Kains et al. [14] (HK), Desmedt et al. [13] (D) and Wirapati et al. [15] (W) and the proliferation module (Proliferation) described in Table S2. BMI values are listed for each consensus set. The last three rows provide the median BMI value over all five consensus sets, the number of times the module was bimodal and the number of times the module was strongly bimodal, respectively.

| Subset    | cc (all, %) | $\kappa$ (all) | $\kappa$ (basal) | $\kappa$ (HER2) | $\kappa$ (lumA) | $\kappa$ (lumB) |
|-----------|-------------|----------------|------------------|-----------------|-----------------|-----------------|
| All       | 98.80       | 0.983          | 1.000            | 1.000           | 0.991           | 0.983           |
| SCM.cs    | 99.57       | 0.994          | 1.000            | 1.000           | 1.000           | 1.000           |
| SSP.cs    | 97.65       | 0.967          | 0.945            | 0.987           | 0.983           | 0.954           |
| SCM.cs HK | 99.57       | 0.994          | 1.000            | 1.000           | 1.000           | 0.991           |
| SCM.cs D  | 99.06       | 0.987          | 1.000            | 1.000           | 1.000           | 0.982           |
| SCM.cs W  | 100.0       | 1.000          | 1.000            | 1.000           | 1.000           | 1.000           |
| SSP.cs S  | 95.68       | 0.939          | 0.945            | 0.987           | 0.920           | 0.904           |
| SSP.cs H  | 97.65       | 0.967          | 0.927            | 0.987           | 0.991           | 0.954           |
| SSP.cs P  | 98.59       | 0.980          | 0.962            | 0.983           | 0.991           | 0.985           |

**Table S5. Resubstitution performance of CS-based predictors.** Median percentage of concordant samples (cc) and median kappa statistics for CS-based predictors used to predict the subtype labels of their own consensus training set, i.e. to predict the associated CS labels. *Subset*: indicates the set of CS-based predictors over which the results were computed. Note that we report median values, it may therefore happen that for each individual subtype the median kappa statistic is equal to 1 but the overall median is not (2<sup>nd</sup> row).

| Subset    | cc (all, %) | $\kappa$ (all) | $\kappa$ (basal) | $\kappa$ (HER2) | $\kappa$ (lumA) | $\kappa$ (lumB) |
|-----------|-------------|----------------|------------------|-----------------|-----------------|-----------------|
| All       | 96.91       | 0.957          | 0.948            | 0.990           | 0.953           | 0.938           |
| SCM.cs    | 97.54       | 0.966          | 0.991            | 0.996           | 0.951           | 0.948           |
| SSP.cs    | 95.66       | 0.940          | 0.931            | 0.983           | 0.956           | 0.902           |
| SCM.cs HK | 97.55       | 0.966          | 1.000            | 0.997           | 0.949           | 0.941           |
| SCM.cs D  | 96.99       | 0.958          | 0.945            | 0.996           | 0.943           | 0.937           |
| SCM.cs W  | 98.44       | 0.978          | 0.991            | 0.996           | 0.967           | 0.959           |
| SSP.cs S  | 94.63       | 0.926          | 0.933            | 0.988           | 0.887           | 0.870           |
| SSP.cs H  | 96.77       | 0.955          | 0.882            | 0.984           | 0.971           | 0.932           |
| SSP.cs P  | 97.55       | 0.966          | 0.955            | 0.972           | 0.970           | 0.960           |

**Table S6. Internal CS validation performance of CS-based predictors.** Median percentage of concordant samples (cc) and median kappa statistics for CS-based predictors used to predict the subtype labels of the union of all 812 CS samples, minus its own consensus training samples. *Subset*: indicates the set of CS-based predictors over which the results were computed.

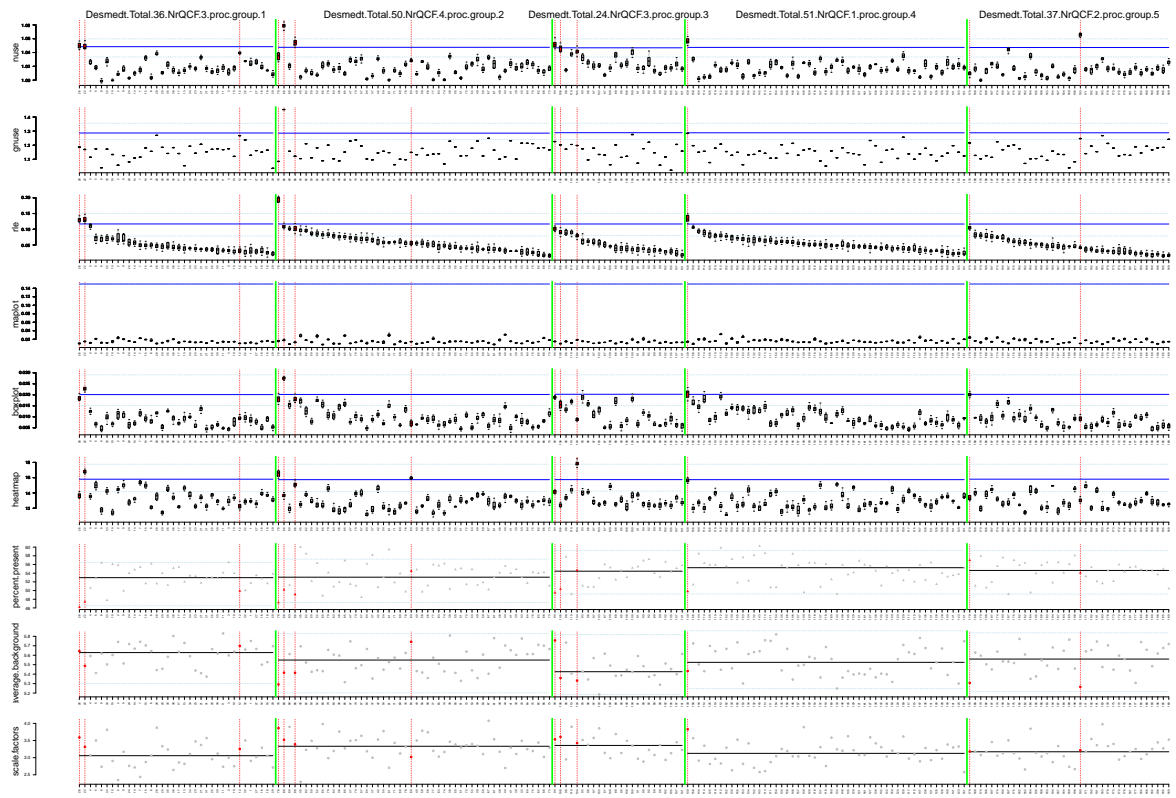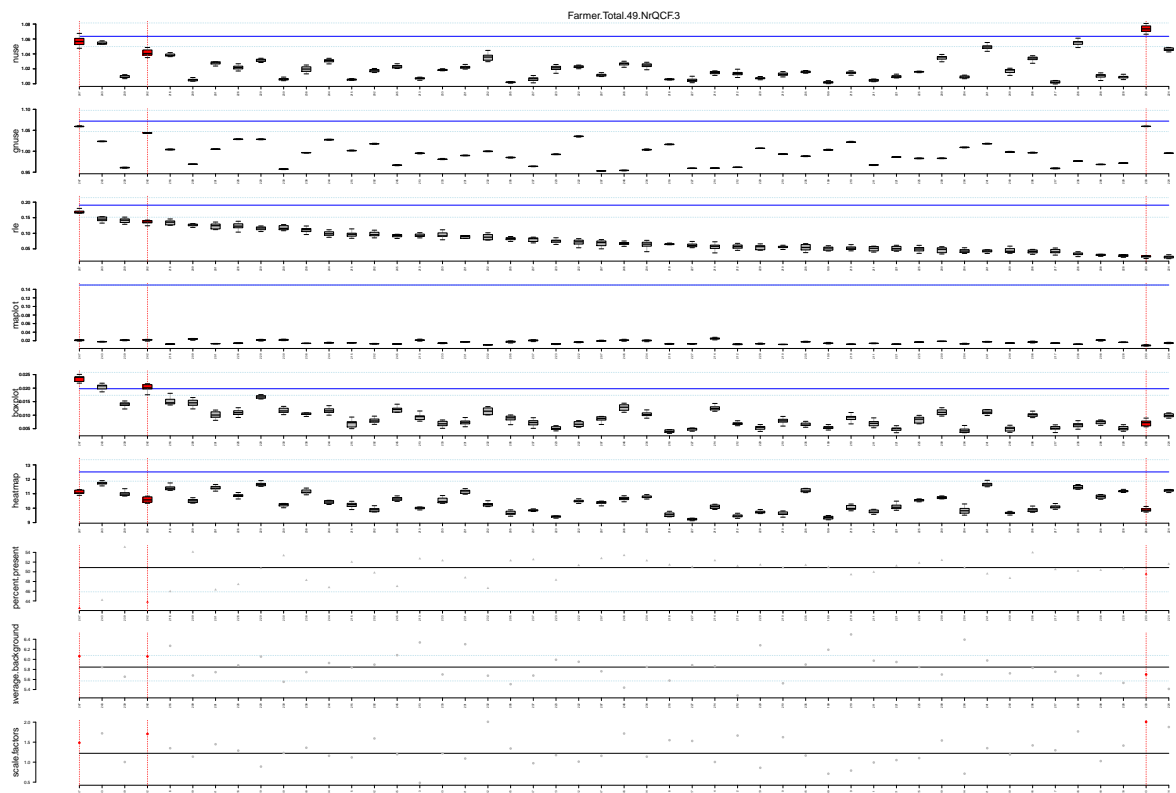



Miller.Total.251.NiOCF.18

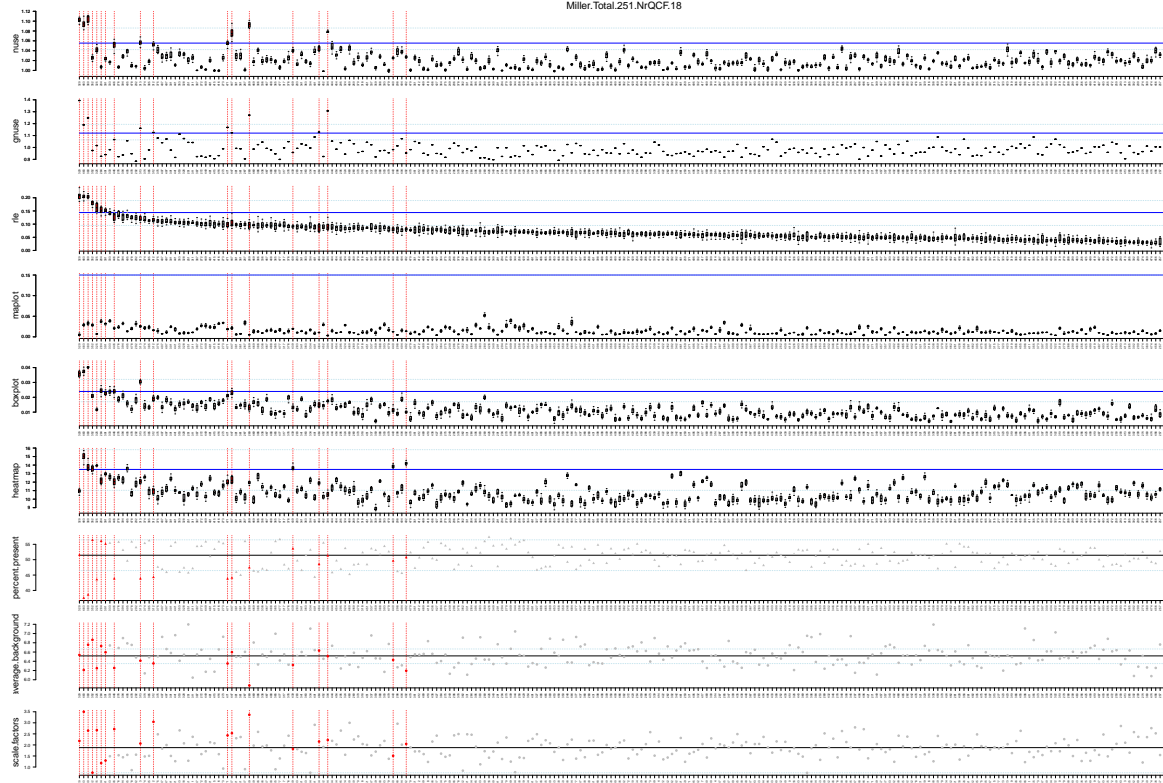

MSK.Total.99.NiOCF.8

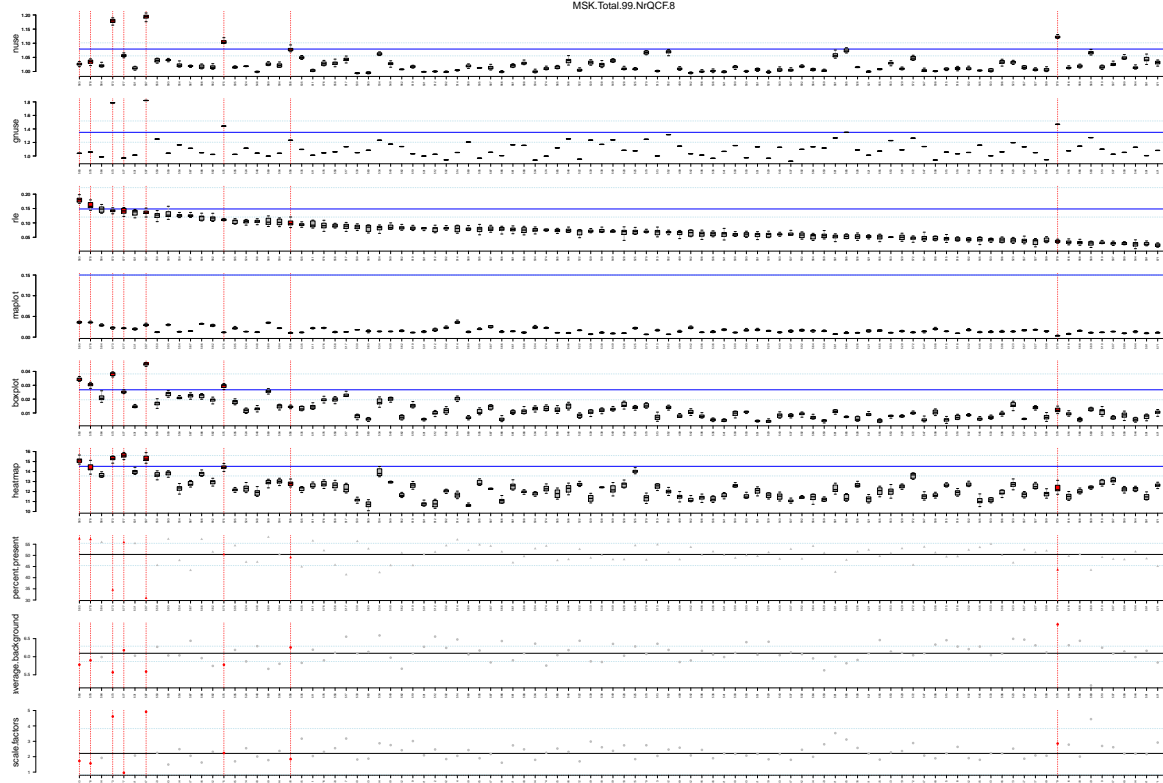

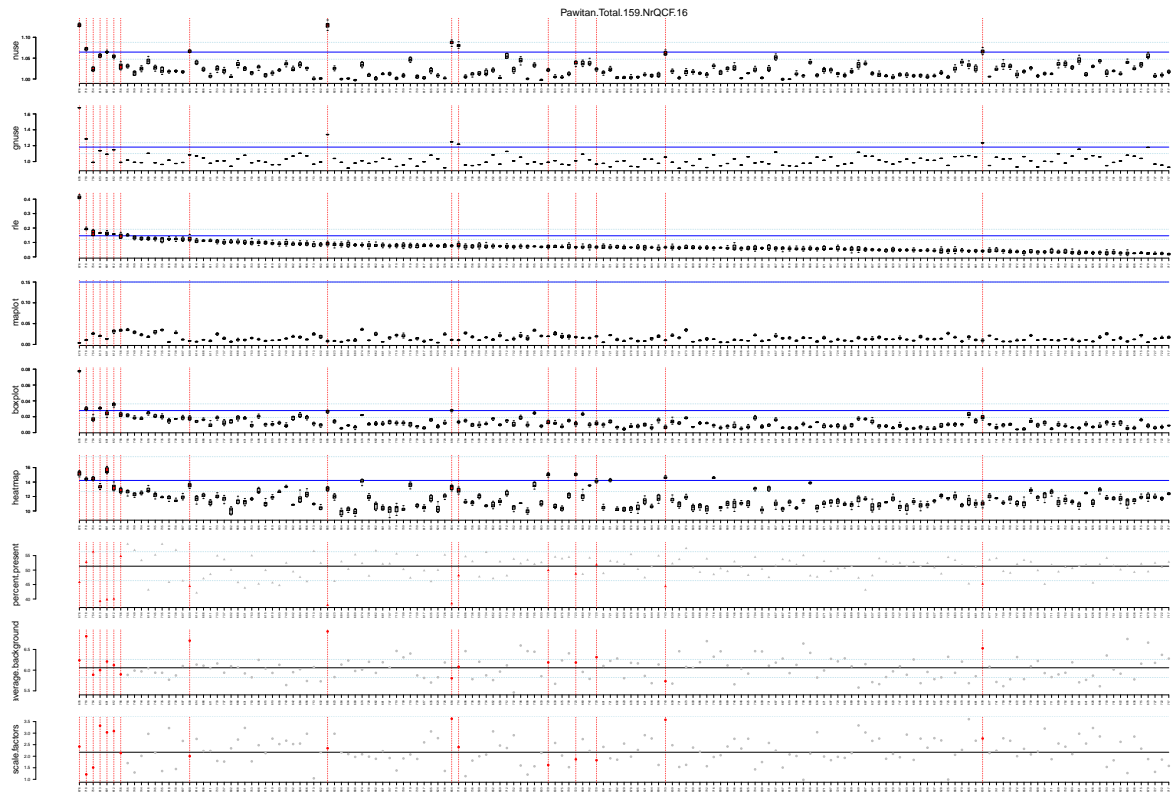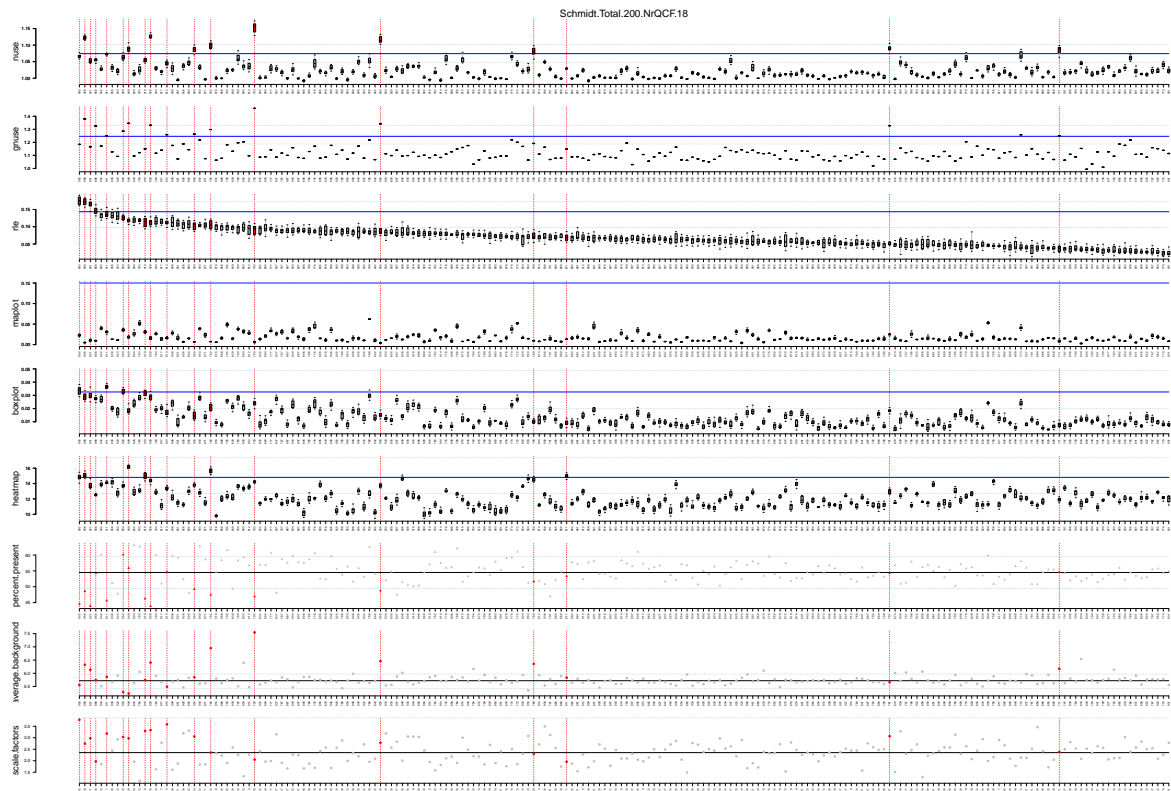

Shi.Total.278.NrQCF.19

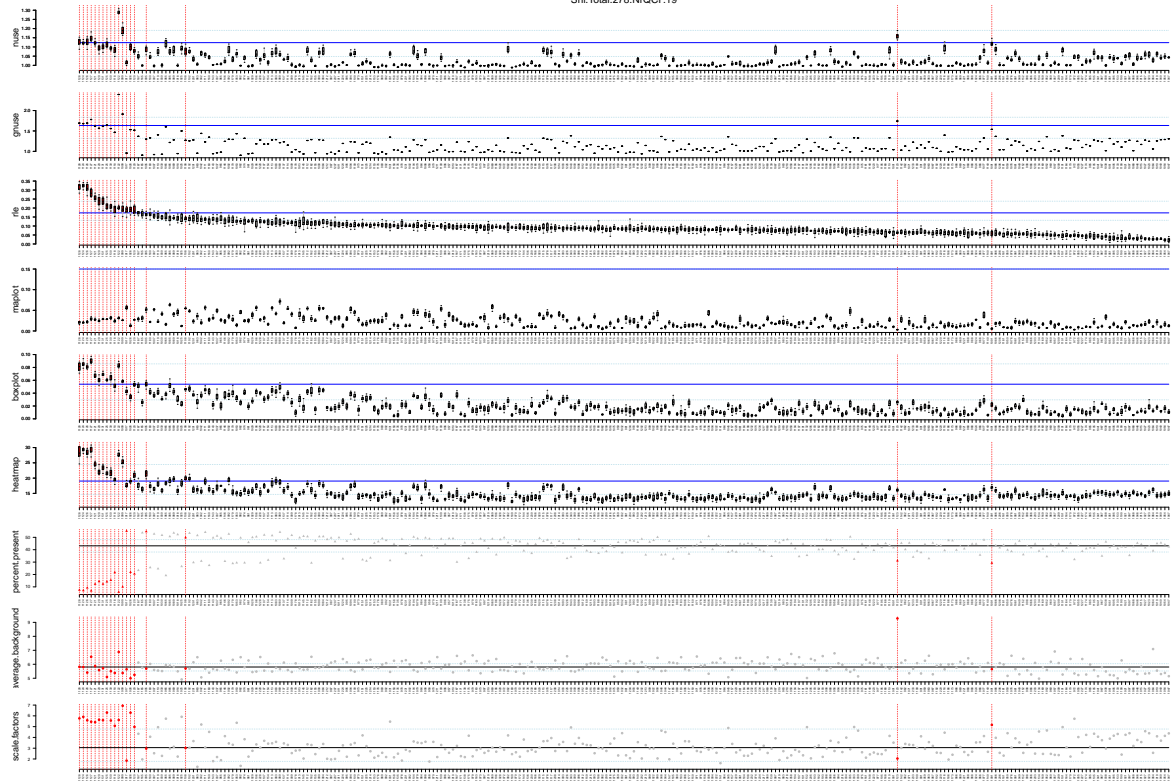

Symmans.1.Total.103.NrQCF.5.proc.group.1

Symmans.1.Total.195.NrQCF.18.proc.group.2

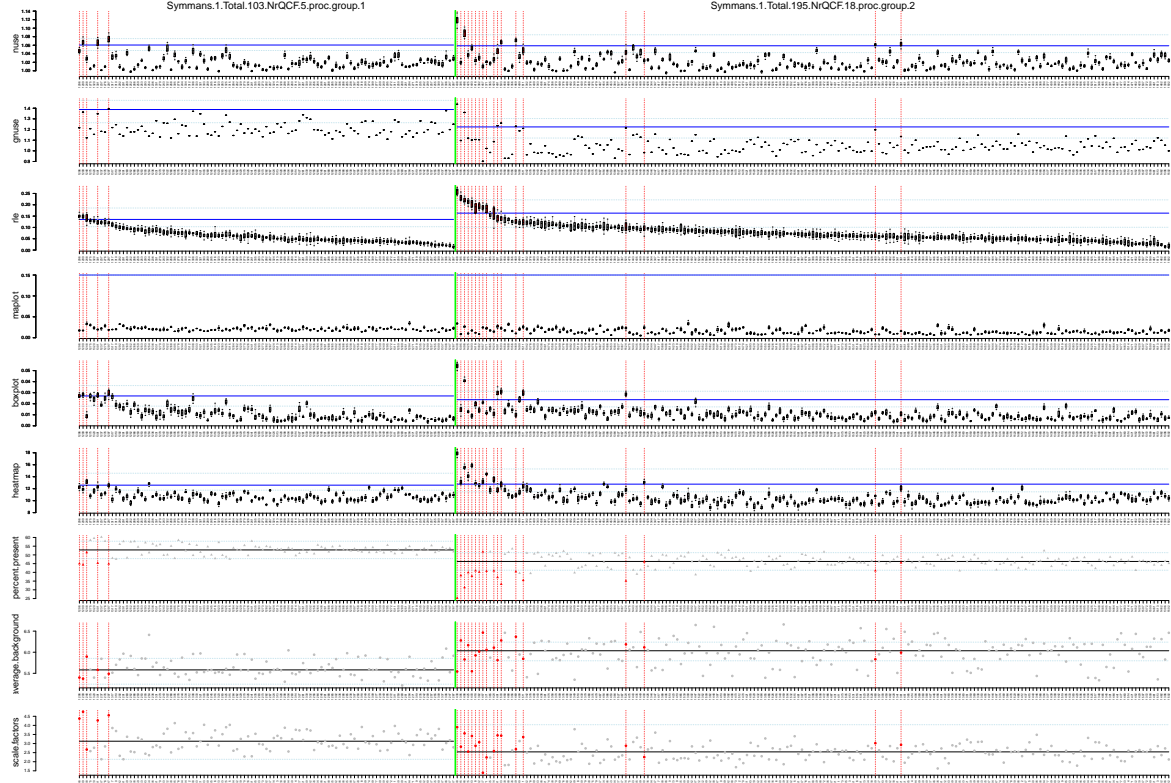

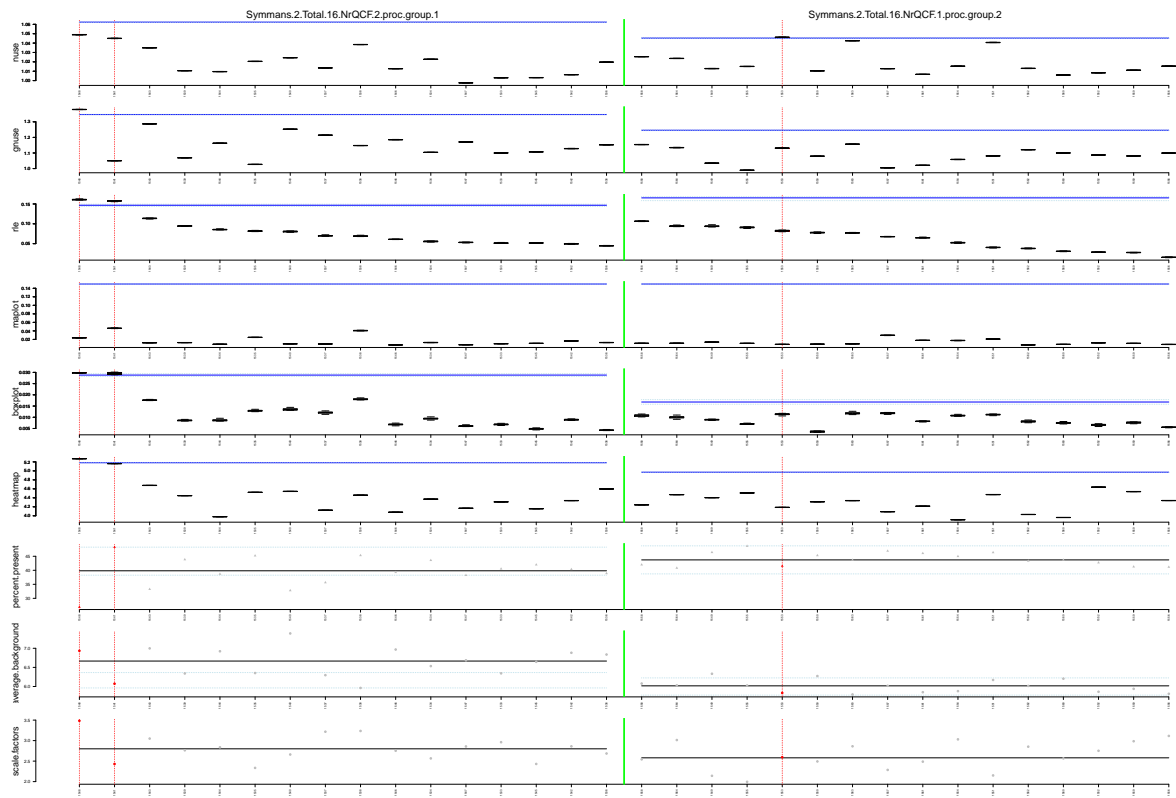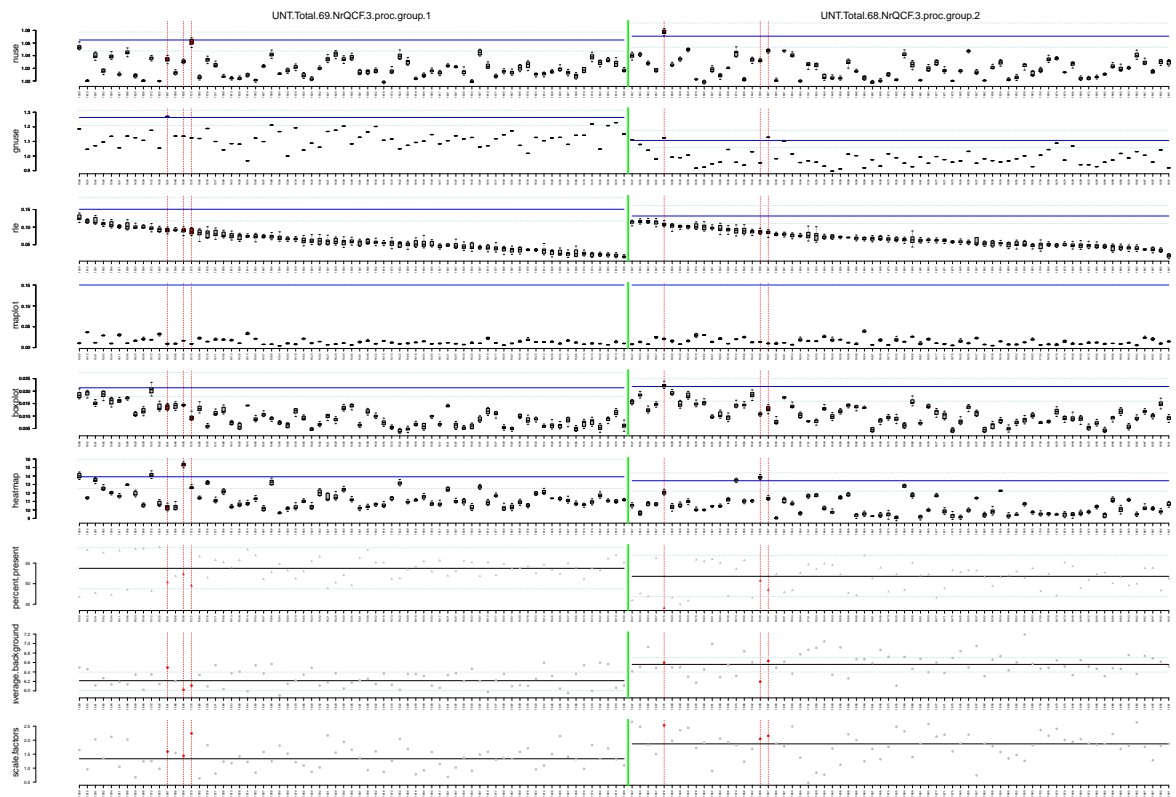

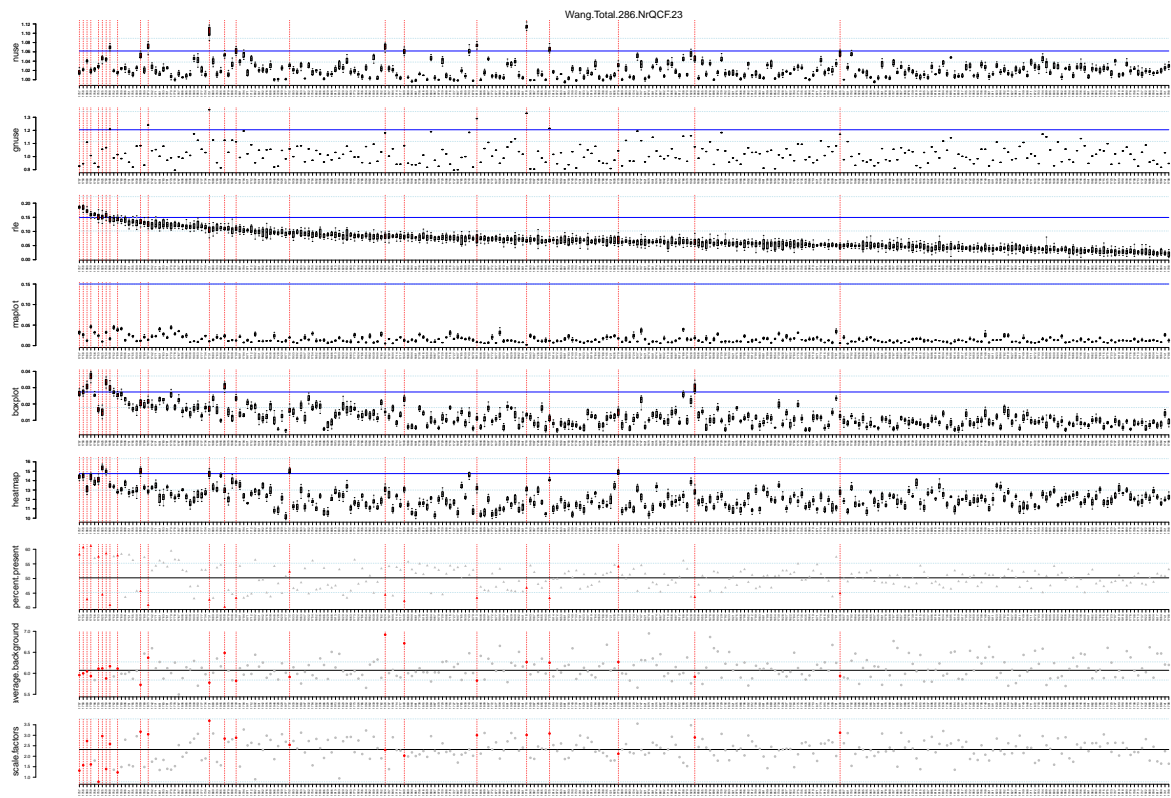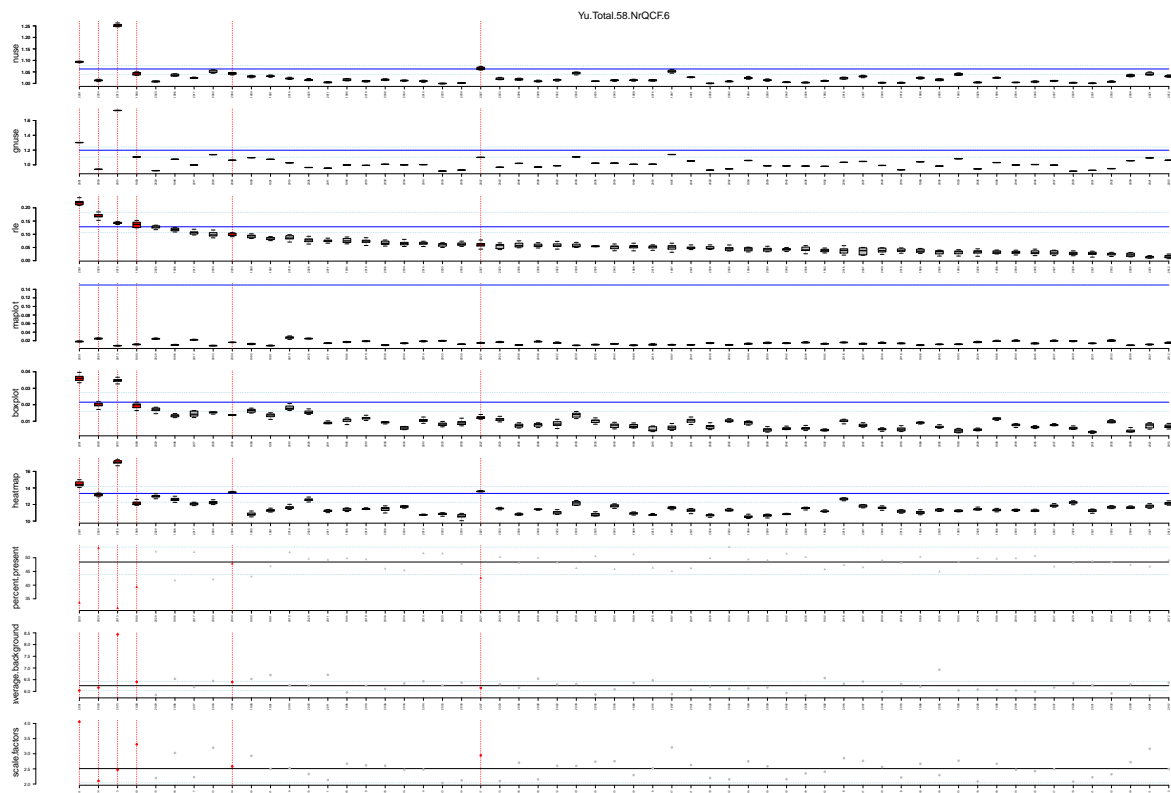

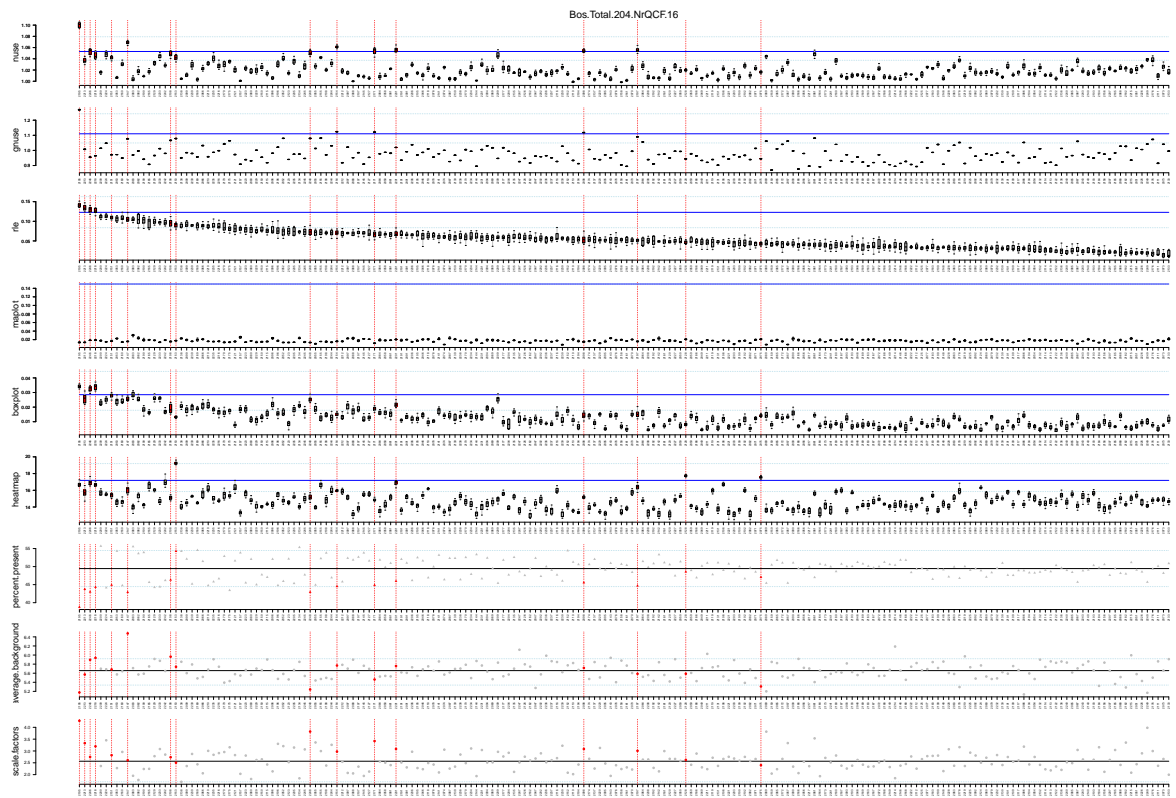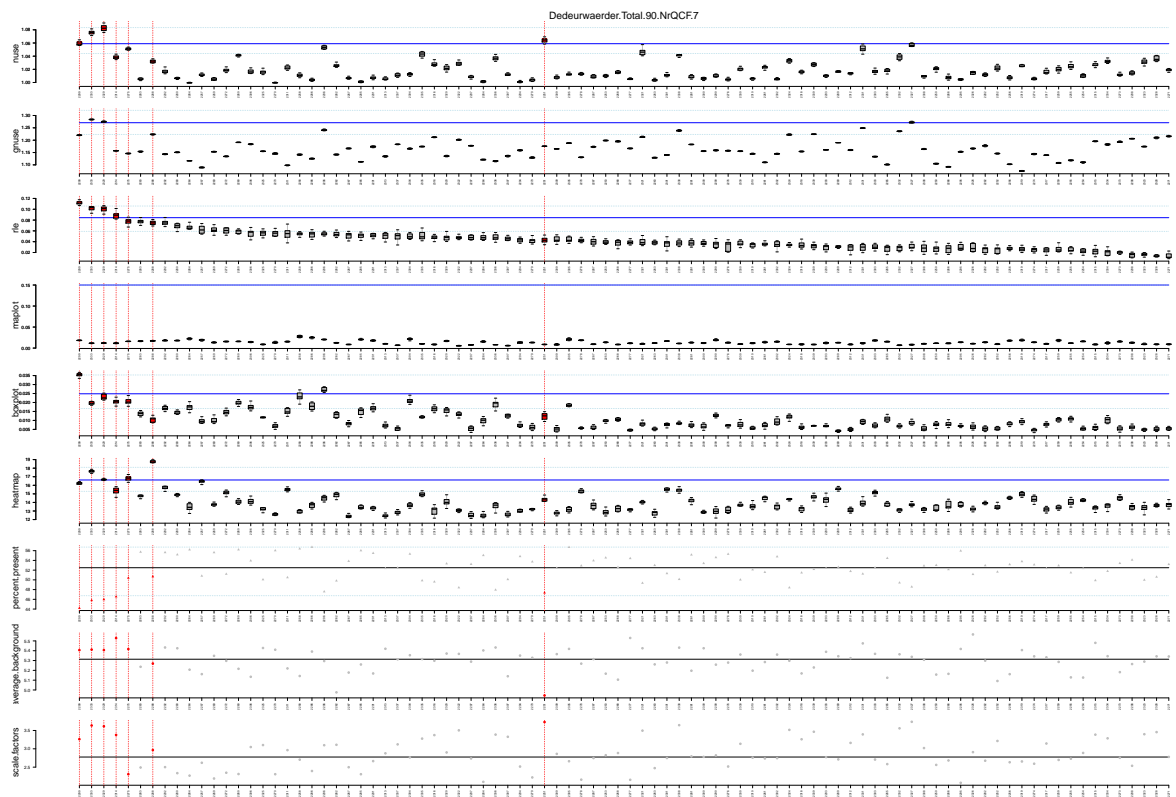

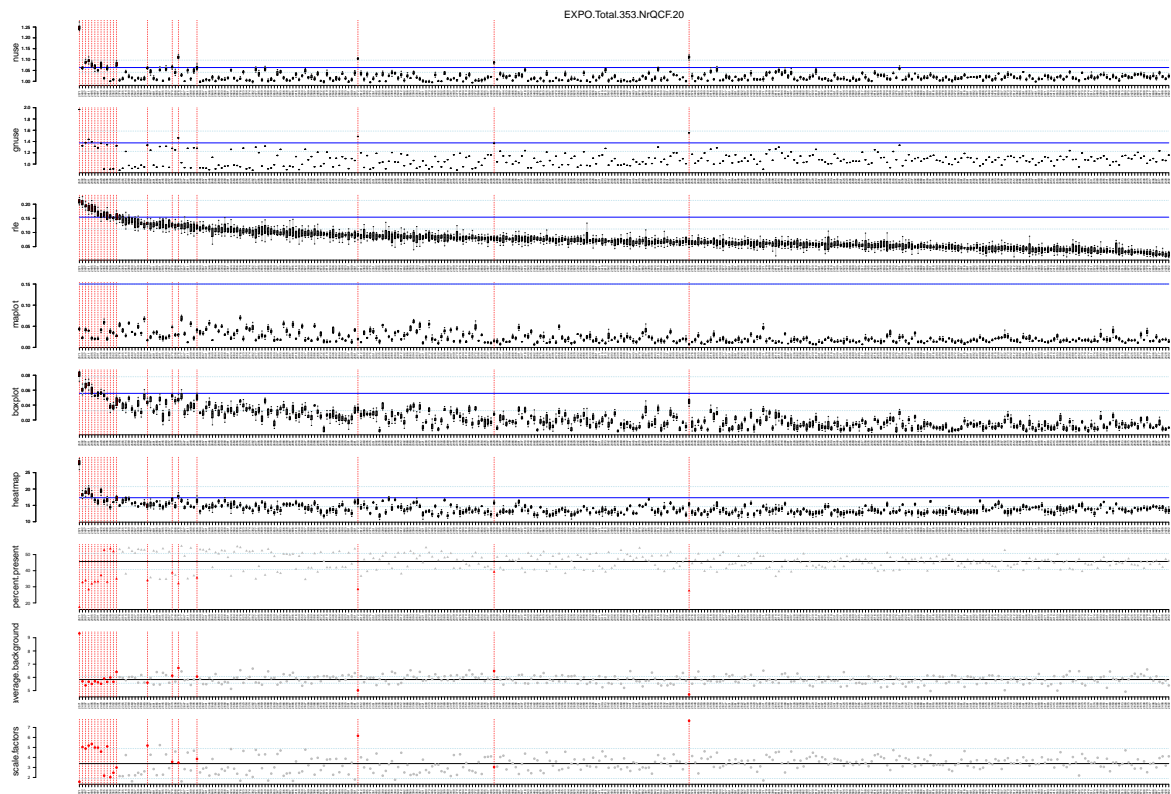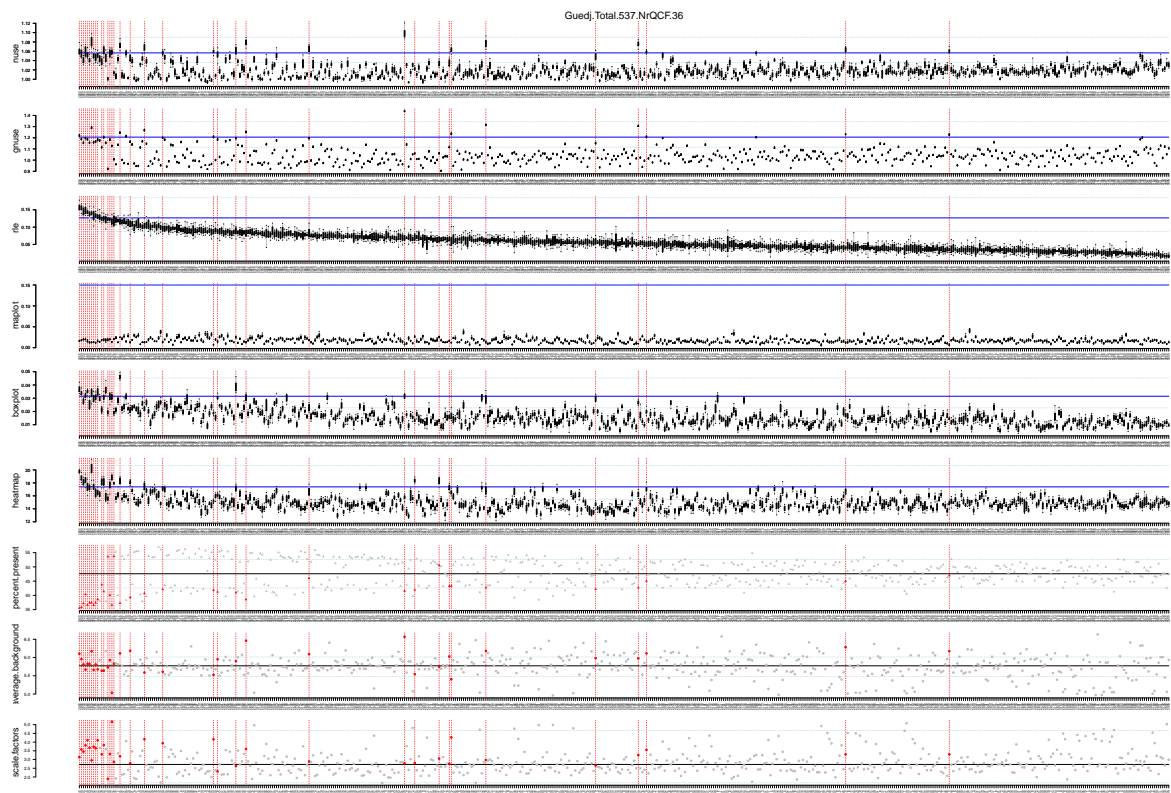



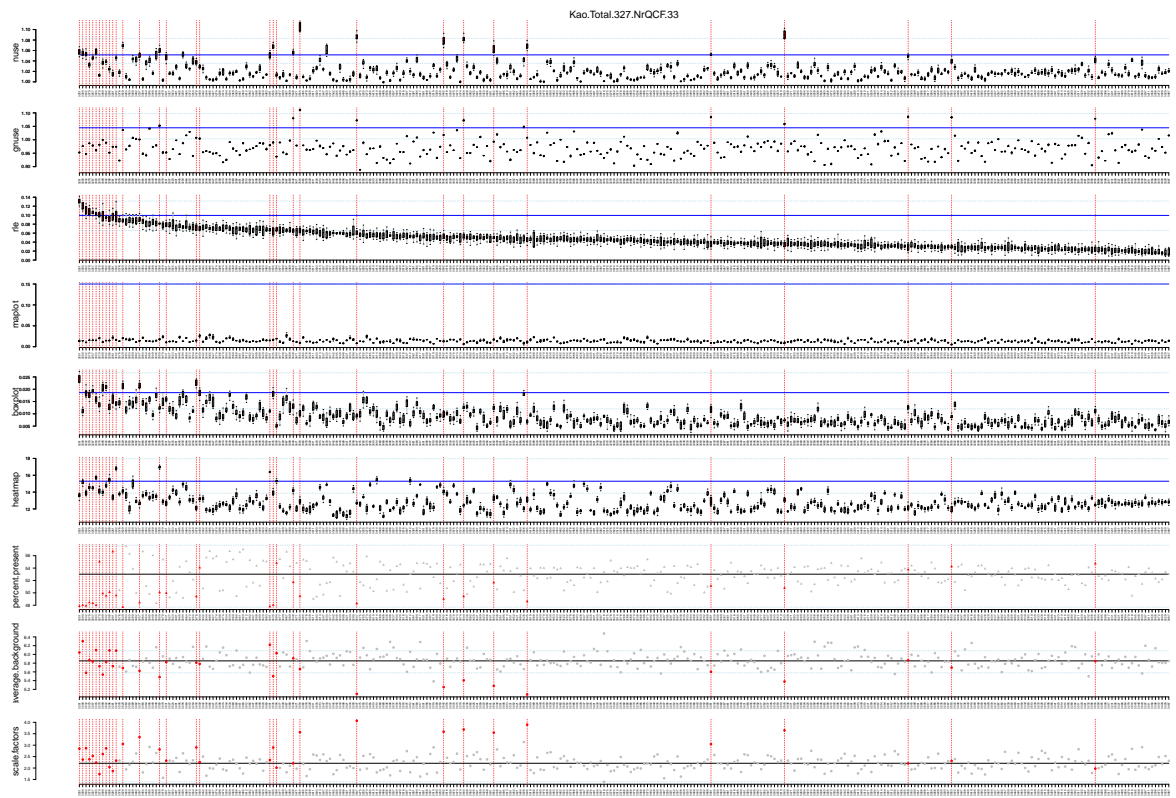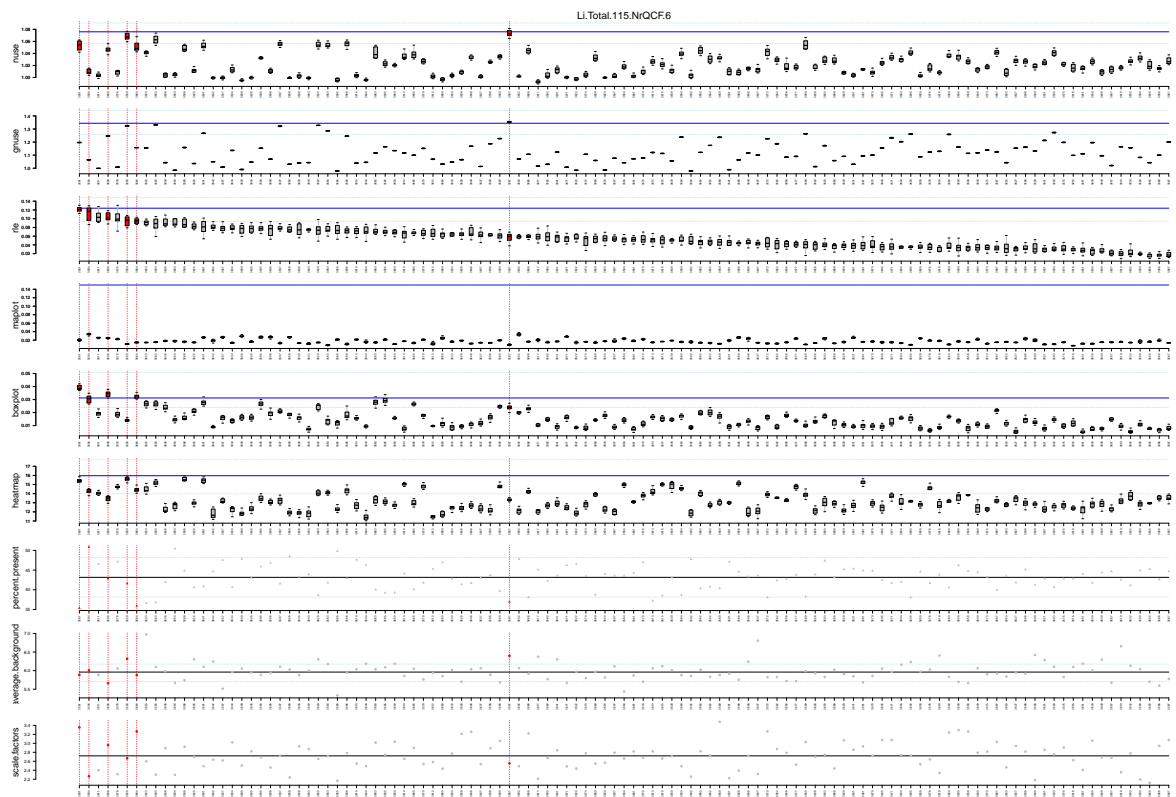



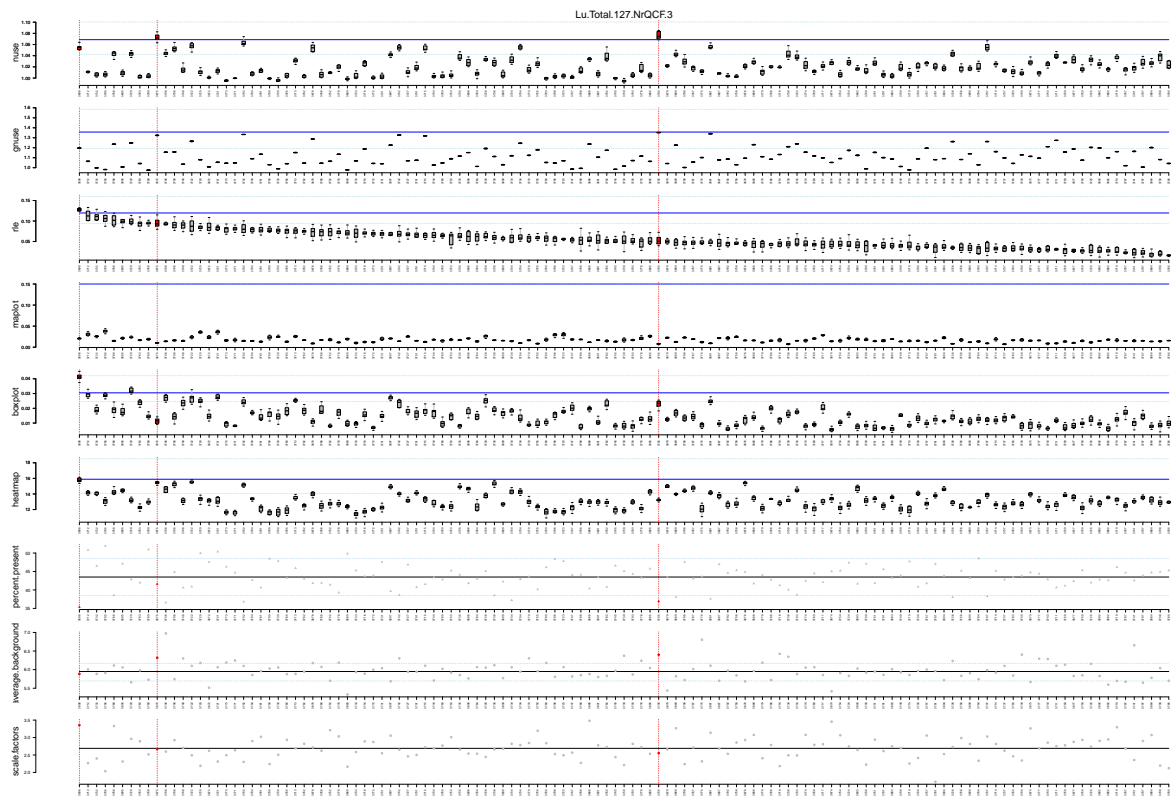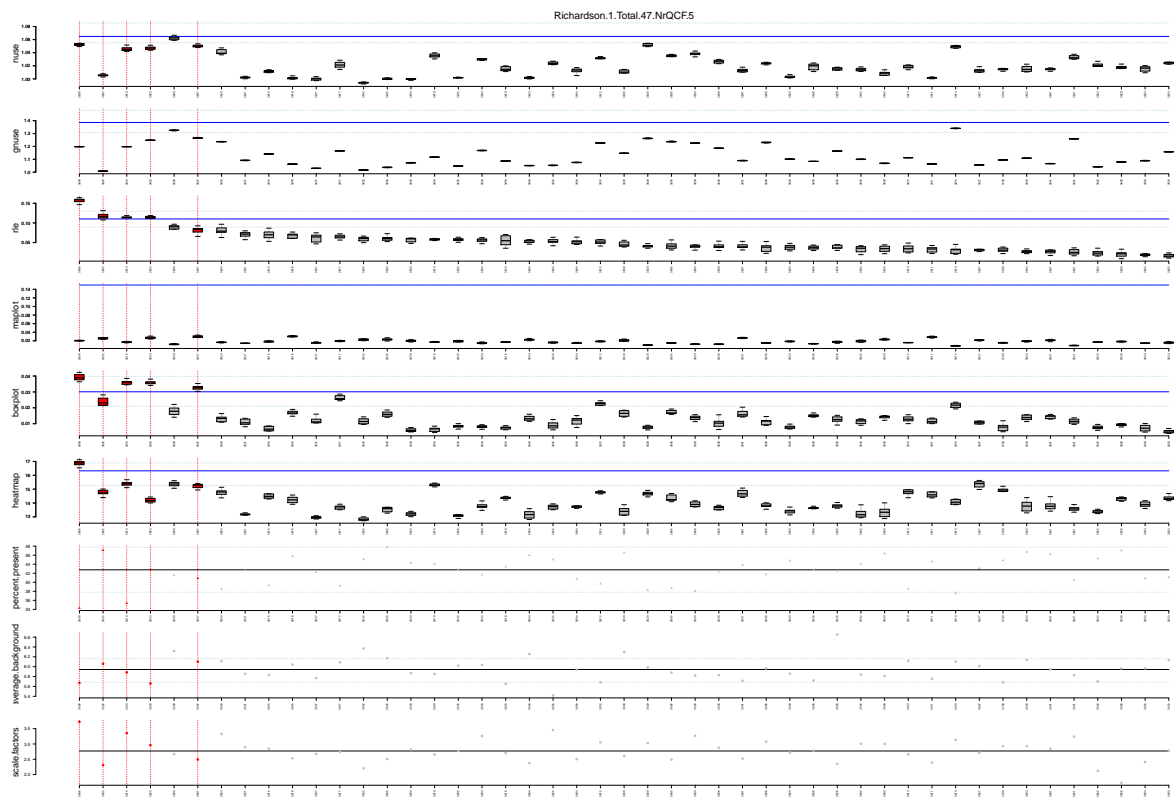

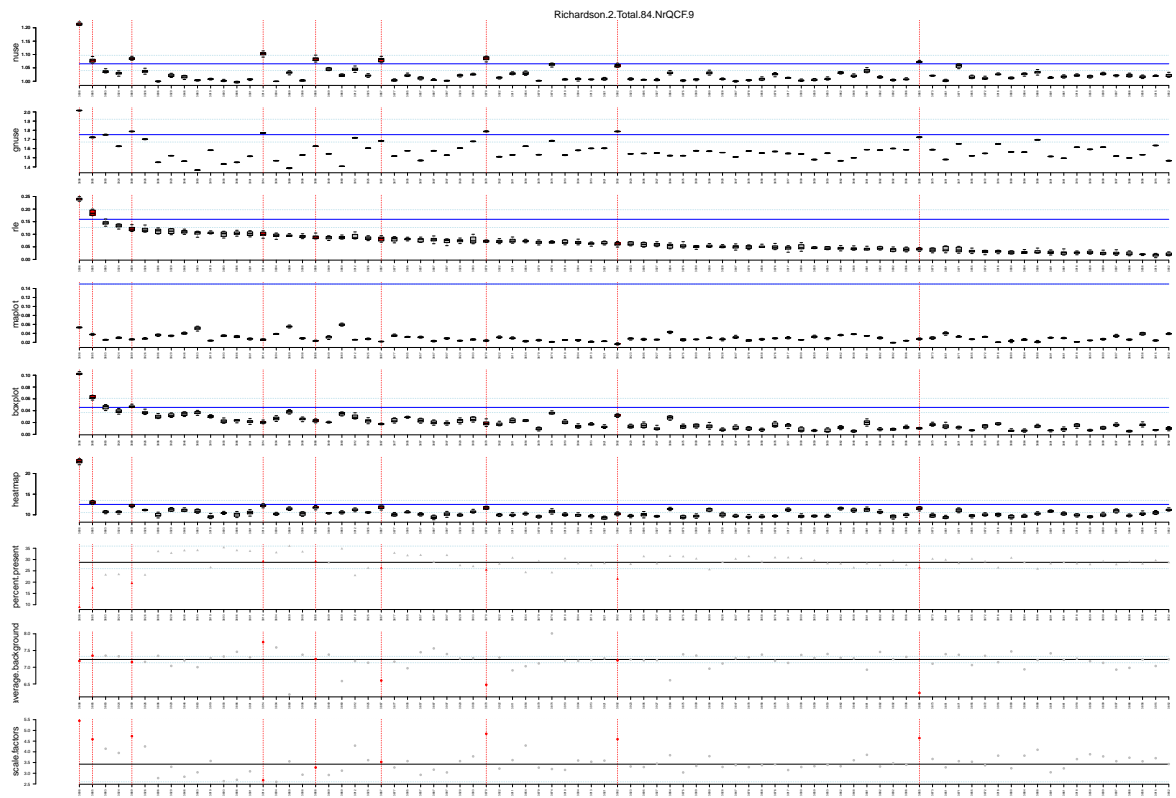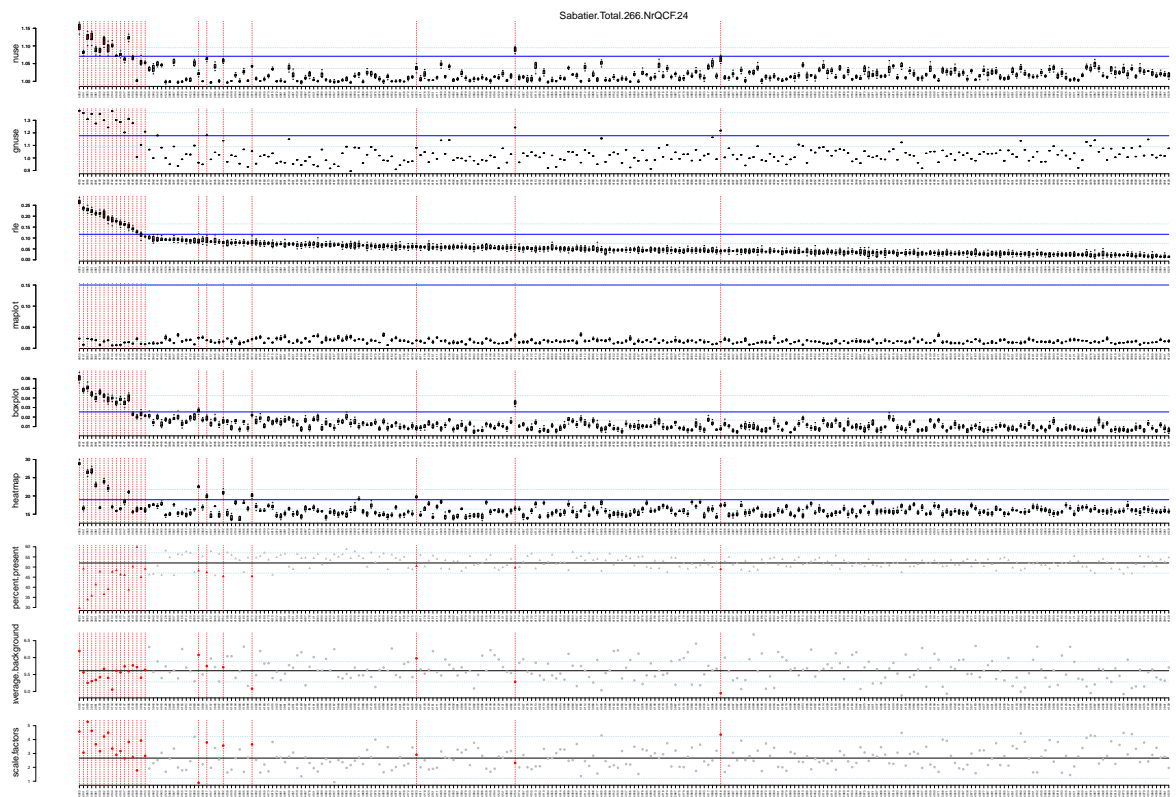

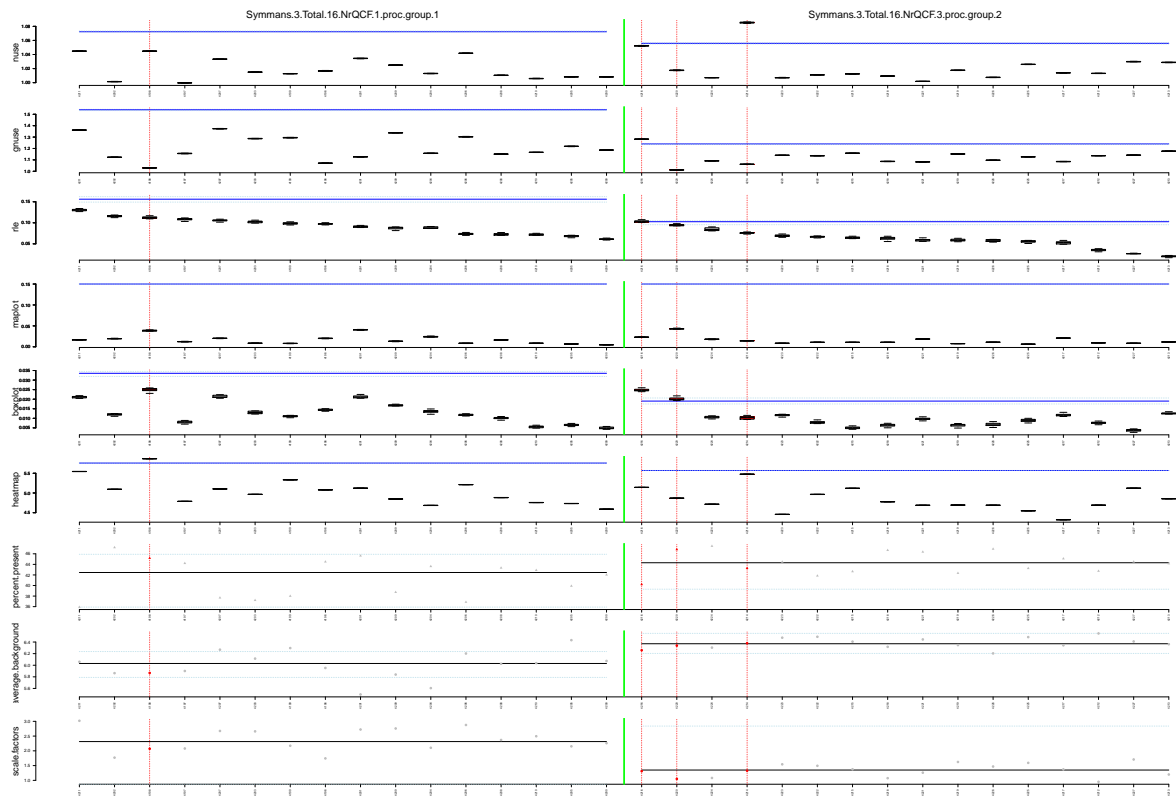

| Index | ID   | CEL                                           | NUSE | GNUSE | RLE | MA-plot | Boxplot | Heatmap |
|-------|------|-----------------------------------------------|------|-------|-----|---------|---------|---------|
| 1     | 12   | GSM177896.cel.gz                              | 3    | 5     | 0   | 0       | 0       | 0       |
| 2     | 22   | GSM177906.cel.gz                              | 5    | 0     | 9   | 0       | 7       | 8       |
| 3     | 26   | GSM177910.cel.gz                              | 5    | 0     | 10  | 0       | 3       | 0       |
| 4     | 60   | GSM177944.cel.gz                              | 0    | 0     | 0   | 0       | 0       | 5       |
| 5     | 68   | GSM177952.cel.gz                              | 10   | 10    | 5   | 0       | 9       | 0       |
| 6     | 78   | GSM177962.cel.gz                              | 0    | 0     | 10  | 0       | 4       | 7       |
| 7     | 86   | GSM177970.cel.gz                              | 7    | 0     | 2   | 0       | 2       | 2       |
| 8     | 94   | GSM177978.cel.gz                              | 8    | 0     | 1   | 0       | 4       | 0       |
| 9     | 104  | GSM177988.cel.gz                              | 3    | 0     | 0   | 0       | 0       | 10      |
| 10    | 106  | GSM177990.cel.gz                              | 5    | 0     | 0   | 0       | 0       | 0       |
| 11    | 139  | GSM178023.cel.gz                              | 8    | 5     | 7   | 0       | 5       | 2       |
| 12    | 179  | GSM178063.cel.gz                              | 0    | 0     | 1   | 0       | 6       | 0       |
| 13    | 193  | GSM178077.cel.gz                              | 10   | 0     | 0   | 0       | 0       | 0       |
| 14    | 203  | GSM26870.CEL.gz                               | 10   | 1     | 0   | 0       | 0       | 0       |
| 15    | 242  | GSM26909.CEL.gz                               | 0    | 0     | 0   | 0       | 6       | 0       |
| 16    | 247  | GSM26914.CEL.gz                               | 3    | 4     | 2   | 0       | 8       | 0       |
| 17    | 269  | GSM79172.CEL.gz                               | 10   | 10    | 0   | 0       | 0       | 0       |
| 18    | 284  | GSM79231.CEL.gz                               | 0    | 0     | 6   | 0       | 3       | 0       |
| 19    | 304  | GSM79314.CEL.gz                               | 9    | 10    | 0   | 0       | 0       | 0       |
| 20    | 312  | GSM79331.CEL.gz                               | 1    | 6     | 1   | 0       | 1       | 0       |
| 21    | 313  | GSM79337.CEL.gz                               | 6    | 9     | 1   | 0       | 10      | 0       |
| 22    | 320  | GSM79350.CEL.gz                               | 10   | 10    | 10  | 0       | 10      | 0       |
| 23    | 325  | GSM79355.CEL.gz                               | 0    | 0     | 4   | 0       | 0       | 6       |
| 24    | 352  | GSM79147.CEL.gz                               | 0    | 0     | 10  | 0       | 3       | 4       |
| 25    | 380  | GSM79194.CEL.gz                               | 10   | 10    | 10  | 0       | 10      | 6       |
| 26    | 391  | GSM79209.CEL.gz                               | 0    | 0     | 7   | 0       | 1       | 1       |
| 27    | 439  | GSM79270.CEL.gz                               | 0    | 0     | 0   | 0       | 0       | 6       |
| 28    | 440  | GSM79271.CEL.gz                               | 0    | 0     | 0   | 0       | 0       | 9       |
| 29    | 446  | GSM79278.CEL.gz                               | 2    | 0     | 2   | 0       | 5       | 0       |
| 30    | 447  | GSM79279.CEL.gz                               | 9    | 4     | 2   | 0       | 4       | 0       |
| 31    | 464  | GSM79303.CEL.gz                               | 0    | 5     | 0   | 0       | 0       | 0       |
| 32    | 471  | GSM79313.CEL.gz                               | 3    | 8     | 0   | 0       | 3       | 0       |
| 33    | 483  | GSM79334.CEL.gz                               | 10   | 10    | 10  | 0       | 10      | 9       |
| 34    | 492  | GSM79356.CEL.gz                               | 0    | 0     | 0   | 0       | 0       | 7       |
| 35    | 556  | GSM50091.CEL.gz                               | 5    | 0     | 0   | 0       | 0       | 7       |
| 36    | 573  | GSM50108.CEL.gz                               | 10   | 10    | 3   | 0       | 9       | 7       |
| 37    | 575  | GSM50110.CEL.gz                               | 9    | 9     | 0   | 0       | 7       | 2       |
| 38    | 577  | GSM50112.CEL.gz                               | 0    | 0     | 4   | 0       | 3       | 10      |
| 39    | 578  | GSM50113.CEL.gz                               | 0    | 0     | 5   | 0       | 4       | 3       |
| 40    | 579  | GSM50114.CEL.gz                               | 10   | 10    | 0   | 0       | 0       | 10      |
| 41    | 583  | GSM50118.CEL.gz                               | 0    | 0     | 8   | 0       | 7       | 10      |
| 42    | 597  | GSM50132.CEL.gz                               | 10   | 10    | 3   | 0       | 10      | 7       |
| 43    | 600  | GSM107074.CEL.gz                              | 5    | 0     | 1   | 0       | 0       | 2       |
| 44    | 612  | GSM107086.CEL.gz                              | 2    | 4     | 6   | 0       | 10      | 0       |
| 45    | 613  | GSM107087.CEL.gz                              | 2    | 3     | 9   | 0       | 5       | 1       |
| 46    | 638  | GSM107112.CEL.gz                              | 6    | 10    | 0   | 0       | 0       | 0       |
| 47    | 654  | GSM107129.CEL.gz                              | 9    | 10    | 0   | 0       | 3       | 0       |
| 48    | 665  | GSM107149.CEL.gz                              | 10   | 10    | 0   | 0       | 5       | 1       |
| 49    | 676  | GSM107151.CEL.gz                              | 10   | 10    | 10  | 0       | 10      | 9       |
| 50    | 691  | GSM107166.CEL.gz                              | 4    | 0     | 7   | 0       | 2       | 10      |
| 51    | 714  | GSM107189.CEL.gz                              | 8    | 9     | 0   | 0       | 0       | 0       |
| 52    | 718  | GSM107193.CEL.gz                              | 5    | 10    | 10  | 0       | 7       | 3       |
| 53    | 720  | GSM107195.CEL.gz                              | 0    | 0     | 0   | 0       | 0       | 6       |
| 54    | 723  | GSM107198.CEL.gz                              | 0    | 0     | 0   | 0       | 0       | 9       |
| 55    | 729  | GSM107204.CEL.gz                              | 0    | 0     | 0   | 0       | 0       | 7       |
| 56    | 743  | GSM107218.CEL.gz                              | 3    | 0     | 0   | 0       | 0       | 6       |
| 57    | 754  | GSM107229.CEL.gz                              | 0    | 0     | 8   | 0       | 0       | 0       |
| 58    | 756  | GSM107231.CEL.gz                              | 0    | 0     | 6   | 0       | 3       | 0       |
| 59    | 769  | GSM282385.CEL.gz                              | 6    | 0     | 0   | 0       | 0       | 3       |
| 60    | 771  | GSM282387.CEL.gz                              | 6    | 5     | 0   | 0       | 0       | 0       |
| 61    | 781  | GSM282397.CEL.gz                              | 8    | 10    | 0   | 0       | 0       | 0       |
| 62    | 782  | GSM282398.CEL.gz                              | 8    | 5     | 0   | 0       | 1       | 6       |
| 63    | 793  | GSM282409.CEL.gz                              | 10   | 10    | 0   | 0       | 0       | 4       |
| 64    | 811  | GSM282427.CEL.gz                              | 0    | 0     | 0   | 0       | 0       | 5       |
| 65    | 813  | GSM282429.CEL.gz                              | 0    | 6     | 0   | 0       | 0       | 0       |
| 66    | 868  | GSM282484.CEL.gz                              | 0    | 9     | 3   | 0       | 1       | 0       |
| 67    | 902  | GSM282518.CEL.gz                              | 1    | 0     | 10  | 0       | 6       | 3       |
| 68    | 911  | GSM282527.CEL.gz                              | 5    | 3     | 4   | 0       | 7       | 2       |
| 69    | 919  | GSM282535.CEL.gz                              | 0    | 0     | 0   | 0       | 2       | 5       |
| 70    | 921  | GSM282537.CEL.gz                              | 0    | 0     | 9   | 0       | 3       | 0       |
| 71    | 928  | GSM282544.CEL.gz                              | 10   | 10    | 0   | 0       | 2       | 0       |
| 72    | 949  | GSM282565.CEL.gz                              | 9    | 10    | 0   | 0       | 0       | 9       |
| 73    | 950  | GSM282566.CEL.gz                              | 2    | 7     | 1   | 0       | 6       | 1       |
| 74    | 954  | GSM282570.CEL.gz                              | 8    | 7     | 0   | 0       | 0       | 1       |
| 75    | 955  | GSM282571.CEL.gz                              | 10   | 10    | 0   | 0       | 0       | 0       |
| 76    | 956  | GSM282572.CEL.gz                              | 10   | 10    | 9   | 0       | 5       | 7       |
| 77    | 1017 | GSM505388_23678_AB01542166_24636.CEL.gz       | 0    | 0     | 7   | 0       | 1       | 2       |
| 78    | 1026 | GSM505397_23678_AB01562100_26133.CEL.gz       | 1    | 1     | 5   | 0       | 0       | 4       |
| 79    | 1091 | GSM505462_29539_AB01833522_35706.CEL.gz       | 6    | 1     | 0   | 0       | 0       | 0       |
| 80    | 1095 | GSM505466_29539_AB01833699_35605.CEL.gz       | 0    | 0     | 2   | 0       | 3       | 7       |
| 81    | 1099 | GSM505470_29539_AB01833733_35649.CEL.gz       | 10   | 10    | 6   | 0       | 4       | 9       |
| 82    | 1108 | GSM505479_29539_AB01833780_35612.CEL.gz       | 2    | 0     | 0   | 0       | 3       | 5       |
| 83    | 1118 | GSM505489_FL398-PERU53.CEL.gz                 | 2    | 2     | 8   | 0       | 5       | 5       |
| 84    | 1120 | GSM505491_FL454-713.CEL.gz                    | 1    | 1     | 6   | 0       | 2       | 5       |
| 85    | 1121 | GSM505492_U133A_FL112_US120_10_13_05.CEL.gz   | 5    | 5     | 10  | 0       | 8       | 9       |
| 86    | 1122 | GSM505493_U133A_FL136_US123_11_14_05.CEL.gz   | 10   | 10    | 9   | 0       | 10      | 10      |
| 87    | 1123 | GSM505494_U133A_FL137_US134_11_14_05.CEL.gz   | 7    | 8     | 0   | 0       | 0       | 1       |
| 88    | 1124 | GSM505495_U133A_FL15_03_17_05.CEL.gz          | 5    | 7     | 10  | 0       | 10      | 10      |
| 89    | 1125 | GSM505496_U133A_FL151_US129_12_08_05.CEL.gz   | 1    | 4     | 10  | 0       | 4       | 5       |
| 90    | 1126 | GSM505497_U133A_FL161_US125_01_10_06.CEL.gz   | 4    | 8     | 10  | 0       | 8       | 10      |
| 91    | 1127 | GSM505498_U133A_FL175_US147_01_13_06_2.CEL.gz | 7    | 9     | 10  | 0       | 10      | 10      |
| 92    | 1128 | GSM505499_U133A_FL32-US2_05_19_05.CEL.gz      | 6    | 7     | 10  | 0       | 8       | 10      |
| 93    | 1129 | GSM505500_U133A_FL46-314_07_08_05.CEL.gz      | 1    | 2     | 8   | 0       | 5       | 9       |
| 94    | 1130 | GSM505501_U133A_FL78_US92_09_01_05.CEL.gz     | 0    | 0     | 9   | 0       | 4       | 8       |
| 95    | 1131 | GSM505502_U133A_FL80_US97_09_01_05.CEL.gz     | 2    | 1     | 8   | 0       | 6       | 7       |
| 96    | 1248 | GSM441637.CEL.gz                              | 0    | 0     | 4   | 0       | 0       | 7       |
| 97    | 1296 | GSM441685.CEL.gz                              | 0    | 0     | 8   | 0       | 3       | 5       |
| 98    | 1297 | GSM441686.CEL.gz                              | 10   | 6     | 3   | 0       | 4       | 5       |
| 99    | 1299 | GSM441688.CEL.gz                              | 10   | 3     | 6   | 0       | 5       | 0       |
| 100   | 1301 | GSM441690.CEL.gz                              | 8    | 1     | 3   | 0       | 6       | 1       |
| 101   | 1361 | GSM441750.CEL.gz                              | 7    | 0     | 0   | 0       | 0       | 1       |

Table S7. Overview of the 319 hybridizations rejected based on QC. Continued on next page.

| Index | ID   | CEL                 | NUSE | GNUSE | RLE | MA-plot | Boxplot | Heatmap |
|-------|------|---------------------|------|-------|-----|---------|---------|---------|
| 102   | 1371 | GSM441760.CEL.gz    | 0    | 0     | 8   | 0       | 0       | 7       |
| 103   | 1382 | GSM441771.CEL.gz    | 0    | 0     | 7   | 0       | 0       | 2       |
| 104   | 1395 | GSM441784.CEL.gz    | 0    | 0     | 9   | 0       | 0       | 4       |
| 105   | 1400 | GSM441789.CEL.gz    | 0    | 0     | 0   | 0       | 0       | 5       |
| 106   | 1403 | GSM441792.CEL.gz    | 2    | 0     | 8   | 0       | 0       | 10      |
| 107   | 1418 | GSM441807.CEL.gz    | 0    | 0     | 7   | 0       | 2       | 4       |
| 108   | 1424 | GSM441813.CEL.gz    | 0    | 0     | 3   | 0       | 0       | 7       |
| 109   | 1425 | GSM441814.CEL.gz    | 0    | 0     | 10  | 0       | 0       | 7       |
| 110   | 1438 | GSM441827.CEL.gz    | 10   | 10    | 10  | 0       | 10      | 10      |
| 111   | 1457 | GSM441846.CEL.gz    | 0    | 0     | 9   | 0       | 3       | 7       |
| 112   | 1460 | GSM441849.CEL.gz    | 6    | 0     | 0   | 0       | 0       | 0       |
| 113   | 1469 | GSM441858.CEL.gz    | 7    | 4     | 0   | 0       | 0       | 0       |
| 114   | 1491 | GSM441880.CEL.gz    | 0    | 3     | 1   | 0       | 9       | 1       |
| 115   | 1496 | GSM441885.CEL.gz    | 10   | 10    | 10  | 0       | 10      | 10      |
| 116   | 1503 | GSM441892.CEL.gz    | 6    | 9     | 2   | 0       | 9       | 3       |
| 117   | 1511 | GSM441900.CEL.gz    | 1    | 0     | 0   | 0       | 9       | 3       |
| 118   | 1524 | GSM441913.CEL.gz    | 2    | 1     | 0   | 0       | 7       | 2       |
| 119   | 1541 | GSM441356.CEL.gz    | 0    | 0     | 10  | 0       | 8       | 0       |
| 120   | 1548 | GSM441363.CEL.gz    | 0    | 10    | 10  | 0       | 10      | 10      |
| 121   | 1553 | GSM441336.CEL.gz    | 10   | 0     | 0   | 0       | 0       | 0       |
| 122   | 1575 | gsm65878.cel.gz     | 6    | 0     | 0   | 0       | 0       | 0       |
| 123   | 1601 | gsm65849.cel.gz     | 0    | 6     | 0   | 0       | 0       | 0       |
| 124   | 1606 | gsm65852.cel.gz     | 0    | 0     | 0   | 0       | 0       | 0       |
| 125   | 1676 | gsm65794.cel.gz     | 9    | 6     | 1   | 0       | 4       | 9       |
| 126   | 1687 | gsm65805.cel.gz     | 0    | 7     | 0   | 0       | 0       | 0       |
| 127   | 1698 | gsm65816.cel.gz     | 0    | 0     | 0   | 0       | 0       | 9       |
| 128   | 1709 | GSM36835.CEL.gz     | 5    | 0     | 1   | 0       | 0       | 1       |
| 129   | 1718 | GSM36861.CEL.gz     | 10   | 10    | 0   | 0       | 0       | 0       |
| 130   | 1725 | GSM36875.CEL.gz     | 4    | 5     | 0   | 0       | 0       | 0       |
| 131   | 1731 | GSM36900.CEL.gz     | 10   | 10    | 0   | 0       | 0       | 4       |
| 132   | 1732 | GSM36901.CEL.gz     | 0    | 0     | 0   | 0       | 0       | 8       |
| 133   | 1750 | GSM36966.CEL.gz     | 0    | 0     | 5   | 0       | 9       | 5       |
| 134   | 1753 | GSM36969.CEL.gz     | 0    | 0     | 5   | 0       | 1       | 0       |
| 135   | 1757 | GSM36991.CEL.gz     | 0    | 0     | 9   | 0       | 6       | 1       |
| 136   | 1758 | GSM36992.CEL.gz     | 0    | 0     | 10  | 0       | 6       | 4       |
| 137   | 1759 | GSM36993.CEL.gz     | 0    | 0     | 7   | 0       | 10      | 1       |
| 138   | 1769 | GSM36879.CEL.gz     | 0    | 0     | 5   | 0       | 4       | 0       |
| 139   | 1779 | GSM36905.CEL.gz     | 0    | 0     | 0   | 0       | 0       | 6       |
| 140   | 1813 | GSM36997.CEL.gz     | 10   | 10    | 0   | 0       | 0       | 0       |
| 141   | 1824 | GSM37030.CEL.gz     | 7    | 0     | 0   | 0       | 0       | 0       |
| 142   | 1836 | GSM37052.CEL.gz     | 5    | 1     | 0   | 0       | 0       | 0       |
| 143   | 1848 | GSM36778.CEL.gz     | 9    | 7     | 3   | 0       | 5       | 1       |
| 144   | 1849 | GSM36787.CEL.gz     | 7    | 0     | 0   | 0       | 2       | 0       |
| 145   | 1858 | GSM36813.CEL.gz     | 2    | 0     | 0   | 0       | 8       | 0       |
| 146   | 1873 | GSM36811.CEL.gz     | 9    | 6     | 1   | 0       | 0       | 0       |
| 147   | 1925 | GSM36984.CEL.gz     | 0    | 0     | 5   | 0       | 0       | 6       |
| 148   | 1949 | GSM36933.CEL.gz     | 0    | 0     | 0   | 0       | 7       | 0       |
| 149   | 1959 | GSM3795.CEL.gz      | 2    | 0     | 4   | 0       | 0       | 5       |
| 150   | 1980 | GSM37044.CEL.gz     | 0    | 0     | 9   | 0       | 6       | 0       |
| 151   | 1999 | GSM120659.CEL.gz    | 2    | 1     | 5   | 0       | 2       | 0       |
| 152   | 2001 | GSM120661.CEL.gz    | 10   | 10    | 10  | 0       | 10      | 10      |
| 153   | 2004 | GSM120665.CEL.gz    | 1    | 0     | 0   | 0       | 0       | 5       |
| 154   | 2013 | GSM120670.CEL.gz    | 10   | 10    | 5   | 0       | 10      | 2       |
| 155   | 2024 | GSM120683.CEL.gz    | 0    | 0     | 8   | 0       | 4       | 2       |
| 156   | 2027 | GSM120686.CEL.gz    | 4    | 0     | 0   | 0       | 0       | 5       |
| 157   | 2075 | GSM308285.CEL.gz    | 0    | 0     | 0   | 0       | 0       | 0       |
| 158   | 2098 | GSM308308.CEL.gz    | 5    | 6     | 0   | 0       | 0       | 0       |
| 159   | 2108 | GSM308319.CEL.gz    | 5    | 0     | 0   | 0       | 0       | 0       |
| 160   | 2128 | GSM308339.CEL.gz    | 0    | 0     | 0   | 0       | 0       | 6       |
| 161   | 2147 | GSM308358.CEL.gz    | 10   | 2     | 4   | 0       | 1       | 0       |
| 162   | 2151 | GSM308362.CEL.gz    | 0    | 0     | 3   | 0       | 6       | 0       |
| 163   | 2153 | GSM308364.CEL.gz    | 2    | 2     | 0   | 0       | 0       | 10      |
| 164   | 2154 | GSM308365.CEL.gz    | 9    | 4     | 0   | 0       | 0       | 0       |
| 165   | 2171 | GSM308382.CEL.gz    | 6    | 5     | 0   | 0       | 0       | 0       |
| 166   | 2195 | GSM308406.CEL.gz    | 10   | 10    | 8   | 0       | 7       | 1       |
| 167   | 2197 | GSM308408.CEL.gz    | 6    | 1     | 0   | 0       | 0       | 1       |
| 168   | 2201 | GSM308412.CEL.gz    | 7    | 0     | 0   | 0       | 0       | 3       |
| 169   | 2213 | GSM308424.CEL.gz    | 0    | 0     | 9   | 0       | 3       | 0       |
| 170   | 2218 | GSM308429.CEL.gz    | 2    | 0     | 5   | 0       | 6       | 1       |
| 171   | 2246 | GSM308457.CEL.gz    | 5    | 0     | 8   | 0       | 9       | 2       |
| 172   | 2248 | GSM308459.CEL.gz    | 7    | 1     | 0   | 0       | 1       | 0       |
| 173   | 2251 | GSM519723.CEL.gz    | 6    | 0     | 0   | 0       | 0       | 0       |
| 174   | 2275 | GSM519747.CEL.gz    | 2    | 0     | 3   | 0       | 2       | 5       |
| 175   | 2288 | GSM519760.CEL.gz    | 0    | 0     | 1   | 0       | 0       | 10      |
| 176   | 2299 | GSM519772.CEL.gz    | 5    | 0     | 10  | 0       | 10      | 3       |
| 177   | 2314 | GSM519787.CEL.gz    | 0    | 0     | 6   | 0       | 1       | 0       |
| 178   | 2329 | GSM519802.CEL.gz    | 10   | 4     | 9   | 0       | 3       | 5       |
| 179   | 2333 | GSM519806.CEL.gz    | 10   | 7     | 10  | 0       | 1       | 10      |
| 180   | 2352 | GSM38062.CEL.gz     | 0    | 0     | 5   | 0       | 0       | 0       |
| 181   | 2365 | GSM46891.CEL.gz     | 0    | 0     | 6   | 0       | 4       | 2       |
| 182   | 2383 | GSM46908.CEL.gz     | 10   | 2     | 4   | 0       | 1       | 0       |
| 183   | 2407 | GSM53034.CEL.gz     | 8    | 3     | 8   | 0       | 8       | 9       |
| 184   | 2411 | GSM53109.CEL.gz     | 9    | 6     | 7   | 0       | 7       | 9       |
| 185   | 2429 | GSM76613.CEL.gz     | 7    | 2     | 8   | 0       | 5       | 8       |
| 186   | 2491 | GSM138035.CEL.gz    | 2    | 0     | 7   | 0       | 3       | 1       |
| 187   | 2492 | GSM138028.CEL.gz    | 3    | 1     | 9   | 0       | 6       | 8       |
| 188   | 2493 | GSM138031.CEL.gz    | 3    | 2     | 8   | 0       | 3       | 2       |
| 189   | 2494 | GSM137950.CEL.gz    | 5    | 2     | 0   | 0       | 0       | 0       |
| 190   | 2495 | GSM137943.CEL.gz    | 6    | 4     | 5   | 0       | 4       | 5       |
| 191   | 2496 | GSM137944.CEL.gz    | 5    | 5     | 4   | 0       | 2       | 1       |
| 192   | 2529 | GSM179932.CEL.gz    | 10   | 4     | 0   | 0       | 0       | 1       |
| 193   | 2548 | GSM231887.CEL.gz    | 0    | 0     | 6   | 0       | 1       | 0       |
| 194   | 2566 | GSM152569.CEL.gz    | 2    | 0     | 0   | 0       | 5       | 0       |
| 195   | 2570 | GSM53161.CEL.gz     | 5    | 0     | 1   | 0       | 3       | 0       |
| 196   | 2571 | GSM53147.CEL.gz     | 10   | 10    | 9   | 0       | 10      | 10      |
| 197   | 2572 | GSM53131.CEL.gz     | 10   | 10    | 0   | 0       | 0       | 2       |
| 198   | 2676 | GSM231918.CEL.gz    | 10   | 8     | 1   | 0       | 2       | 6       |
| 199   | 2678 | GSM277707.CEL.gz    | 10   | 9     | 0   | 0       | 0       | 0       |
| 200   | 2747 | FB_1214_U133_2.CEL  | 0    | 0     | 0   | 0       | 0       | 9       |
| 201   | 2757 | RLi_74_U133_2.CEL   | 3    | 0     | 1   | 0       | 2       | 8       |
| 202   | 2764 | FB_3562_U133_2.CEL  | 0    | 0     | 5   | 0       | 0       | 0       |
| 203   | 2802 | HdT_1025_U133_2.CEL | 5    | 0     | 4   | 0       | 4       | 3       |

Table S7. Overview of the 319 hybridizations rejected based on QC. Continued on next page.

| Index | ID   | CEL                                        | NUSE | GNUSE | RLE | MA-plot | Boxplot | Heatmap |
|-------|------|--------------------------------------------|------|-------|-----|---------|---------|---------|
| 204   | 2803 | HdT_10324.U133.2.CEL                       | 0    | 1     | 7   | 0       | 3       | 2       |
| 205   | 2804 | HdT_10381.U133.2.CEL                       | 4    | 3     | 8   | 0       | 7       | 7       |
| 206   | 2820 | DB_73.U133.2.CEL                           | 9    | 10    | 8   | 0       | 7       | 10      |
| 207   | 2832 | DB_9941.U133.2.CEL                         | 7    | 5     | 6   | 0       | 6       | 8       |
| 208   | 2835 | DB_9077.U133.2.CEL                         | 5    | 0     | 3   | 0       | 1       | 3       |
| 209   | 2842 | DB_9983.U133.2.CEL                         | 7    | 9     | 1   | 0       | 0       | 1       |
| 210   | 2912 | 071213-18.CEL                              | 7    | 5     | 0   | 0       | 0       | 0       |
| 211   | 2914 | 071213-20.CEL                              | 8    | 5     | 0   | 0       | 0       | 4       |
| 212   | 2945 | 090806-07.CEL                              | 6    | 5     | 0   | 0       | 2       | 3       |
| 213   | 2956 | 040706-22.CEL                              | 0    | 0     | 3   | 0       | 0       | 6       |
| 214   | 2970 | 071213-04.CEL                              | 6    | 7     | 0   | 0       | 0       | 0       |
| 215   | 2977 | 071213-01.CEL                              | 9    | 6     | 0   | 0       | 3       | 0       |
| 216   | 3033 | HdT_9913.U133.2.CEL                        | 0    | 0     | 7   | 0       | 1       | 6       |
| 217   | 3043 | DB_69.U133.2.CEL                           | 5    | 5     | 0   | 0       | 0       | 0       |
| 218   | 3052 | HdT_3411.U133.2.CEL                        | 6    | 0     | 1   | 0       | 9       | 5       |
| 219   | 3055 | HdT_9911.U133.2.CEL                        | 7    | 6     | 9   | 0       | 9       | 10      |
| 220   | 3062 | DB_56.U133.2.CEL                           | 2    | 0     | 6   | 0       | 6       | 2       |
| 221   | 3063 | DB_57.U133.2.CEL                           | 1    | 0     | 0   | 0       | 0       | 6       |
| 222   | 3064 | DB_58.U133.2.CEL                           | 1    | 1     | 6   | 0       | 4       | 3       |
| 223   | 3078 | HdT_3311.U133.2.CEL                        | 5    | 4     | 0   | 0       | 3       | 1       |
| 224   | 3079 | HdT_3296.U133.2.CEL                        | 1    | 1     | 0   | 0       | 5       | 0       |
| 225   | 3084 | DB_40.U133.2.CEL                           | 10   | 10    | 0   | 0       | 1       | 1       |
| 226   | 3085 | DB_42.U133.2.CEL                           | 10   | 8     | 2   | 0       | 10      | 6       |
| 227   | 3099 | HdT_3139.U133.2.CEL                        | 1    | 1     | 2   | 0       | 0       | 8       |
| 228   | 3121 | 250706-15.CEL                              | 0    | 0     | 0   | 0       | 0       | 9       |
| 229   | 3158 | DB_11442.U133.2.CEL                        | 0    | 0     | 2   | 0       | 0       | 10      |
| 230   | 3159 | HdT_2570.U133.2.CEL                        | 10   | 10    | 0   | 0       | 4       | 0       |
| 231   | 3165 | HdT_2377.U133.2.CEL                        | 3    | 4     | 5   | 0       | 2       | 1       |
| 232   | 3170 | DB_11651.U133.2.CEL                        | 9    | 7     | 0   | 0       | 0       | 7       |
| 233   | 3172 | DB_11614.U133.2.CEL                        | 7    | 2     | 7   | 0       | 5       | 7       |
| 234   | 3176 | DB_17.U133.2.CEL                           | 10   | 10    | 0   | 0       | 2       | 1       |
| 235   | 3209 | DB_10797.U133.2.CEL                        | 5    | 4     | 2   | 0       | 0       | 5       |
| 236   | 3242 | GSM519129.CEL.gz                           | 2    | 0     | 4   | 0       | 1       | 8       |
| 237   | 3251 | GSM519138.CEL.gz                           | 6    | 0     | 10  | 0       | 10      | 0       |
| 238   | 3257 | GSM519144.CEL.gz                           | 2    | 0     | 5   | 0       | 4       | 0       |
| 239   | 3270 | GSM519157.CEL.gz                           | 0    | 0     | 5   | 0       | 0       | 0       |
| 240   | 3281 | GSM519168.CEL.gz                           | 0    | 0     | 5   | 0       | 2       | 0       |
| 241   | 3296 | GSM519183.CEL.gz                           | 0    | 0     | 3   | 0       | 1       | 5       |
| 242   | 3300 | GSM519187.CEL.gz                           | 5    | 0     | 7   | 0       | 0       | 5       |
| 243   | 3301 | GSM519188.CEL.gz                           | 4    | 0     | 0   | 0       | 0       | 8       |
| 244   | 3303 | GSM519190.CEL.gz                           | 4    | 0     | 6   | 0       | 2       | 7       |
| 245   | 3337 | GSM519224.CEL.gz                           | 5    | 0     | 3   | 0       | 8       | 0       |
| 246   | 3350 | GSM519237.CEL.gz                           | 6    | 6     | 1   | 0       | 0       | 9       |
| 247   | 3379 | GSM519266.CEL.gz                           | 0    | 0     | 5   | 0       | 1       | 1       |
| 248   | 3381 | GSM519268.CEL.gz                           | 3    | 10    | 0   | 0       | 0       | 0       |
| 249   | 3394 | GSM519287.CEL.gz                           | 0    | 1     | 0   | 0       | 0       | 5       |
| 250   | 3400 | GSM519287.CEL.gz                           | 0    | 1     | 1   | 0       | 8       | 0       |
| 251   | 3476 | GSM519363.CEL.gz                           | 0    | 0     | 0   | 0       | 9       | 0       |
| 252   | 3499 | GSM519386.CEL.gz                           | 0    | 0     | 3   | 0       | 7       | 0       |
| 253   | 3502 | GSM519389.CEL.gz                           | 0    | 0     | 4   | 0       | 7       | 0       |
| 254   | 3529 | GSM519416.CEL.gz                           | 7    | 3     | 2   | 0       | 4       | 1       |
| 255   | 3531 | GSM519418.CEL.gz                           | 5    | 0     | 1   | 0       | 1       | 0       |
| 256   | 3532 | GSM519419.CEL.gz                           | 6    | 0     | 9   | 0       | 6       | 0       |
| 257   | 3535 | GSM519422.CEL.gz                           | 8    | 0     | 1   | 0       | 5       | 0       |
| 258   | 3542 | GSM519429.CEL.gz                           | 9    | 1     | 0   | 0       | 0       | 0       |
| 259   | 3543 | GSM519430.CEL.gz                           | 10   | 7     | 0   | 0       | 0       | 0       |
| 260   | 3544 | GSM519431.CEL.gz                           | 10   | 10    | 0   | 0       | 0       | 0       |
| 261   | 3545 | GSM519432.CEL.gz                           | 10   | 1     | 0   | 0       | 0       | 0       |
| 262   | 3547 | GSM519434.CEL.gz                           | 10   | 9     | 0   | 0       | 0       | 0       |
| 263   | 3548 | GSM519435.CEL.gz                           | 6    | 8     | 0   | 0       | 0       | 0       |
| 264   | 3552 | GSM519439.CEL.gz                           | 6    | 0     | 0   | 0       | 0       | 0       |
| 265   | 3553 | GSM519440.CEL.gz                           | 2    | 9     | 0   | 0       | 0       | 0       |
| 266   | 3554 | GSM519441.CEL.gz                           | 10   | 10    | 0   | 0       | 0       | 0       |
| 267   | 3555 | GSM519442.CEL.gz                           | 1    | 10    | 0   | 0       | 0       | 0       |
| 268   | 3556 | GSM519443.CEL.gz                           | 3    | 10    | 0   | 0       | 1       | 0       |
| 269   | 3559 | GSM491177.CEL.gz                           | 1    | 0     | 1   | 0       | 0       | 5       |
| 270   | 3581 | GSM491199.CEL.gz                           | 0    | 0     | 3   | 0       | 9       | 4       |
| 271   | 3587 | GSM491205.CEL.gz                           | 2    | 6     | 0   | 0       | 0       | 0       |
| 272   | 3594 | GSM491212.CEL.gz                           | 0    | 0     | 3   | 0       | 6       | 0       |
| 273   | 3608 | GSM491226.CEL.gz                           | 0    | 0     | 0   | 0       | 7       | 0       |
| 274   | 3664 | GSM491282.CEL.gz                           | 0    | 0     | 0   | 0       | 7       | 0       |
| 275   | 3675 | GSM124997.CEL.gz                           | 7    | 2     | 1   | 0       | 0       | 5       |
| 276   | 3698 | GSM125020.CEL.gz                           | 2    | 0     | 5   | 0       | 10      | 4       |
| 277   | 3705 | GSM125027.CEL.gz                           | 7    | 4     | 0   | 0       | 0       | 0       |
| 278   | 3802 | GSM85476.CEL.gz                            | 0    | 0     | 6   | 0       | 0       | 0       |
| 279   | 3807 | GSM85481.CEL.gz                            | 0    | 0     | 0   | 0       | 7       | 0       |
| 280   | 3808 | GSM85482.CEL.gz                            | 0    | 0     | 10  | 0       | 10      | 9       |
| 281   | 3810 | GSM85484.CEL.gz                            | 0    | 0     | 5   | 0       | 7       | 0       |
| 282   | 3823 | GSM85497.CEL.gz                            | 0    | 0     | 6   | 0       | 9       | 0       |
| 283   | 3865 | GSM467542.CEL.gz                           | 7    | 2     | 0   | 0       | 0       | 0       |
| 284   | 3867 | GSM467544.CEL.gz                           | 8    | 0     | 0   | 0       | 0       | 0       |
| 285   | 3868 | GSM467545.CEL.gz                           | 8    | 0     | 0   | 0       | 0       | 0       |
| 286   | 3870 | GSM467547.CEL.gz                           | 8    | 6     | 0   | 0       | 0       | 0       |
| 287   | 3885 | GSM467562.CEL.gz                           | 9    | 1     | 8   | 0       | 10      | 8       |
| 288   | 3889 | GSM467566.CEL.gz                           | 10   | 8     | 0   | 0       | 6       | 1       |
| 289   | 3898 | GSM467575.CEL.gz                           | 10   | 10    | 10  | 0       | 10      | 10      |
| 290   | 3902 | GSM467579.CEL.gz                           | 4    | 8     | 0   | 0       | 0       | 0       |
| 291   | 3914 | GSM467591.CEL.gz                           | 10   | 7     | 0   | 0       | 0       | 3       |
| 292   | 3930 | GSM540108.160306-23.CEL.gz                 | 10   | 9     | 10  | 0       | 9       | 10      |
| 293   | 3931 | GSM540109.060406-05.CEL.gz                 | 10   | 10    | 10  | 0       | 10      | 10      |
| 294   | 3932 | GSM540110.200406-16.CEL.gz                 | 10   | 9     | 10  | 0       | 10      | 10      |
| 295   | 3938 | GSM540116.160302-01.CEL.gz                 | 2    | 0     | 5   | 0       | 2       | 0       |
| 296   | 3952 | GSM540130.160302-02.CEL.gz                 | 1    | 0     | 0   | 0       | 0       | 10      |
| 297   | 3961 | GSM540139.080414-04.CEL.gz                 | 8    | 9     | 10  | 0       | 10      | 10      |
| 298   | 3963 | GSM540141.090905-02.CEL.gz                 | 10   | 10    | 10  | 0       | 10      | 10      |
| 299   | 3970 | GSM540148.090205-23.CEL.gz                 | 0    | 0     | 1   | 0       | 1       | 8       |
| 300   | 4009 | GSM540187.080318-06.CEL.gz                 | 0    | 0     | 6   | 0       | 0       | 0       |
| 301   | 4016 | GSM540194.270905-10.CEL.gz                 | 1    | 5     | 0   | 0       | 0       | 0       |
| 302   | 4017 | GSM540195.260106-08.CEL.gz                 | 5    | 4     | 1   | 0       | 1       | 6       |
| 303   | 4023 | GSM540201.260106-07.CEL.gz                 | 0    | 0     | 0   | 0       | 0       | 7       |
| 304   | 4036 | GSM540214.260106-06.2nd_scan.taches.CEL.gz | 10   | 10    | 10  | 0       | 9       | 9       |
| 305   | 4053 | GSM540231.071205-05.CEL.gz                 | 10   | 10    | 10  | 0       | 10      | 10      |

Table S7. Overview of the 319 hybridizations rejected based on QC. Continued on next page.

| Index | ID   | CEL                         | NUSE | GNUSE | RLE | MA-plot | Boxplot | Heatmap |
|-------|------|-----------------------------|------|-------|-----|---------|---------|---------|
| 306   | 4139 | GSM540317_15719_T1.CEL.gz   | 8    | 10    | 10  | 0       | 10      | 0       |
| 307   | 4140 | GSM540318_15724_T2.CEL.gz   | 7    | 10    | 8   | 0       | 2       | 0       |
| 308   | 4141 | GSM540319_15744_T7.CEL.gz   | 6    | 9     | 10  | 0       | 10      | 0       |
| 309   | 4143 | GSM540321_15765_T9.CEL.gz   | 0    | 8     | 3   | 0       | 1       | 0       |
| 310   | 4144 | GSM540322_15986_T24.CEL.gz  | 9    | 10    | 10  | 0       | 9       | 0       |
| 311   | 4145 | GSM540323_16137_T39.CEL.gz  | 6    | 9     | 10  | 0       | 9       | 0       |
| 312   | 4146 | GSM540324_16325_T56.CEL.gz  | 4    | 10    | 10  | 0       | 10      | 0       |
| 313   | 4147 | GSM540325_17231_T125.CEL.gz | 2    | 7     | 10  | 0       | 8       | 3       |
| 314   | 4154 | GSM540332_090115-08.CEL.gz  | 6    | 6     | 0   | 0       | 9       | 0       |
| 315   | 4165 | GSM540343_090129-01.CEL.gz  | 0    | 0     | 1   | 0       | 2       | 10      |
| 316   | 4198 | GSM441382.CEL.gz            | 0    | 0     | 0   | 0       | 0       | 10      |
| 317   | 4214 | GSM441366.CEL.gz            | 10   | 0     | 0   | 0       | 0       | 0       |
| 318   | 4216 | GSM441368.CEL.gz            | 0    | 10    | 8   | 0       | 10      | 0       |
| 319   | 4220 | GSM441372.CEL.gz            | 0    | 0     | 1   | 0       | 9       | 0       |

**Table S7.** Overview of the 319 hybridizations rejected based on QC. ID: short array identifier used in the QC overview figures, pages 12-23; CEL: the original CEL file name. This frequently equates to the GSM accession number from GEO extended with ‘.CEL.gz’. The remaining six columns indicate in how many of  $R = 10$  QC repeats the array was flagged for each of the six QC indicators NUSE, GNUSE, RLE, MA-plot, boxplot and heatmap.

## References

- [1] McCall, M.N., Bolstad, B.M., Irizarry, R.A.: Frozen robust multiarray analysis (fRMA). *Biostatistics* **11**(2), 242–253 (2010)
- [2] McCall, M., Irizarry, R.: Thawing frozen robust multi-array analysis (fRMA). *BMC Bioinformatics* **12**, 369 (2011)
- [3] Guedj, .M., Marisa, .L., De Reynies, .A., Orsetti, .B., Schiappa, .R., Bibeau, .F., MacGrogan, .G., Lerebours, .F., Finetti, .P., Longy, .M., Bertheau, .P., *et al.*: A refined molecular taxonomy of breast cancer. *Oncogene* **31**(9), 1196–1206 (2012)
- [4] Kauffmann, A., Huber, W.: Microarray data quality control improves the detection of differentially expressed genes. *Genomics* **95**(3), 138–142 (2010)
- [5] McCall, M.N., Murakami, P.N., Lukk, M., Huber, W., Irizarry, R.A.: Assessing Affymetrix GeneChip microarray quality. *BMC Bioinformatics* **12**, 137 (2011)
- [6] Bolstad, B.M.: Low-level analysis of high-density oligonucleotide array data: background, normalization and summarization. PhD thesis, , University of California (2004)
- [7] Leek, J.T., Scharpf, R.B., Bravo, H.C., Simcha, D., Langmead, B., Johnson, W.E., Geman, D., Baggerly, K., Irizarry, R.A.: Tackling the widespread and critical impact of batch effects in high-throughput data. *Nature Reviews Genetics* **11**(10), 733–739 (2010)
- [8] Edgar, R., Domrachev, M., Lash, A.E.: Gene Expression Omnibus: NCBI gene expression and hybridization array data repository. *Nucleic Acids Research* **30**(1), 207–210 (2002)
- [9] Friedman, J., Hastie, T., Tibshirani, R.: *The Elements of Statistical Learning: Data Mining, Inference, and Prediction*, 1st edn. Springer, New York, NY (2001)
- [10] Hu, Z., Fan, C., Oh, D.S., Marron, J., He, X., Qaqish, B.F., Livasy, C., Carey, L.A., Reynolds, E., Dressler, L., *et al.*: The molecular portraits of breast tumors are conserved across microarray platforms. *BMC Genomics* **7**, 96 (2006)
- [11] Parker, J.S., Mullins, M., Cheang, M.C.U., Leung, S., Voduc, D., Vickery, T., Davies, S., Fauron, C., He, X., Hu, Z., *et al.*: Supervised risk predictor of breast cancer based on intrinsic subtypes. *Journal of Clinical Oncology* **27**(8), 1160–1167 (2009)
- [12] Sørlie, T., Tibshirani, R., Parker, J., Hastie, T., Marron, J., Nobel, A., Deng, S., Johnsen, H., Pesich, R., Geisler, S., *et al.*: Repeated observation of breast tumor subtypes in independent gene expression data sets. *Proceedings of the National Academy of Sciences* **100**(14), 8418–8423 (2003)

- [13] Desmedt, C., Haibe-Kains, B., Wirapati, P., Buyse, M., Larsimont, D., Bontempi, G., Delorenzi, M., Piccart, M., Sotiriou, C.: Biological processes associated with breast cancer clinical outcome depend on the molecular subtypes. *Clinical Cancer Research* **14**(16), 5158–5165 (2008)
- [14] Haibe-Kains, B., Desmedt, C., Loi, S., Culhane, A.C., Bontempi, G., Quackenbush, J., Sotiriou, C.: A three-gene model to robustly identify breast cancer molecular subtypes. *Journal of the National Cancer Institute* **104**(4), 311–325 (2012)
- [15] Wirapati, P., Sotiriou, C., Kunkel, S., Farmer, P., Pradervand, S., Haibe-Kains, B., Desmedt, C., *et al.*: Meta-analysis of gene expression profiles in breast cancer: toward a unified understanding of breast cancer subtyping and prognosis signatures. *Breast Cancer Research* **10**(4), 65 (2008)
- [16] Goldhirsch, A., Wood, W., Coates, A., Gelber, R., Thürlimann, B., Senn, H.J., *et al.*: Strategies for subtypes - dealing with the diversity of breast cancer: highlights of the St Gallen International Expert Consensus on the Primary Therapy of Early Breast Cancer 2011. *Annals of Oncology* **22**(8), 1736–1747 (2011)
- [17] Wang, J., Wen, S., Symmans, W.F., Pusztai, L., Coombes, K.R.: The bimodality index: a criterion for discovering and ranking bimodal signatures from cancer gene expression profiling data. *Cancer Informatics* **7**, 199–216 (2009)
- [18] Nielsen, T.O., Parker, J.S., Leung, S., Voduc, D., Ebbert, M., Vickery, T., Davies, S.R., Snider, J., Stijleman, I.J., Reed, J., *et al.*: A comparison of PAM50 intrinsic subtyping with immunohistochemistry and clinical prognostic factors in tamoxifen-treated estrogen receptor-positive breast cancer. *Clinical Cancer Research* **16**(21), 5222–5232 (2010)
- [19] Tibshirani, R., Walther, G.: Cluster validation by prediction strength. *Journal of Computational and Graphical Statistics* **14**(3), 511–528 (2005)
- [20] Lusa, L., McShane, L.M., Reid, J.F., De Cecco, L., Ambroggi, F., Biganzoli, E., Gariboldi, M., Pierotti, M.A.: Challenges in projecting clustering results across gene expression profiling datasets. *Journal of the National Cancer Institute* **99**(22), 1715–1723 (2007)
- [21] Pusztai, L., Mazouni, C., Anderson, K., Wu, Y., Symmans, W.F.: Molecular classification of breast cancer: limitations and potential. *The Oncologist* **11**(8), 868–877 (2006)
